# Supplementary material for: Copper-catalyzed direct C–H phosphorylation of N-imino isoquinolinium ylides with H-phosphonates
Source: Royal Society of Chemistry journal article supplement (doi:10.1039/c9qo00107g), 2019-01-01

# Copper-Catalyzed Direct C-H Phosphorylation of N-iminoisoquinolinium ylides with H-Phosphonates

Xin-Chen Zhan, Yu-Yuan Hei, Jian-Lan Song, Peng-Cheng Qian, Xing-Guo Zhang\*,  
Chen-Liang Deng\*

College of Chemistry and Materials Engineering, Wenzhou University, Wenzhou  
325035, China.

E-mail: [dcl78@wzu.edu.cn](mailto:dcl78@wzu.edu.cn) and [zxg@wzu.edu.cn](mailto:zxg@wzu.edu.cn)

## Supporting Information

### Contents

|     |                                                      |    |
|-----|------------------------------------------------------|----|
| I   | General Methods .....                                | 2  |
| II  | Optimization of reaction conditions .....            | 2  |
| III | Characterization of products .....                   | 4  |
| IV  | References .....                                     | 11 |
| V   | <sup>1</sup> H and <sup>13</sup> C NMR Spectra ..... | 12 |

## I General Methods:

Chemicals were either purchased or purified by standard techniques.  $^1\text{H}$  NMR and  $^{13}\text{C}$  NMR spectra were measured on a Bruker ADVANCE-500 spectrometer ( $^1\text{H}$  at 500 MHz,  $^{13}\text{C}$  at 125 MHz), using  $\text{CDCl}_3$  as the solvent with tetramethylsilane (TMS) as an internal standard at room temperature. Chemical shifts are given in  $\delta$  relative to  $\text{CDCl}_3$ , the coupling constants  $J$  are given in hertz. High resolution mass spectra were recorded on an ESI-Q-TOF mass spectrometry. All reactions under nitrogen atmosphere were conducted using standard Schlenk techniques. Melting points were measured on X-4 melting point apparatus (Beijing Tech. Instrument) and uncorrected. Infrared data was measured by infrared ( $\text{cm}^{-1}$ ). Column chromatography was performed using EM Silica gel 60 (300-400 mesh).

**Synthesis of N-iminoisoquinolinium ylides.** All the isoquinoline N-amides was prepared by previously reported procedure. <sup>[1]</sup>

## II Optimization of reaction conditions:

### 1) Synthesis of compounds **3**

To an oven dried 10 mL vial was added (tert-butoxycarbonyl) (3-phenylisoquinolin-2-ium-2-yl) amide (**1a**, 0.1 mmol, 1.0 equiv) and diethyl phosphonate (**2a**, 0.2 mmol, 2.0 equiv) in 2 mL solvent, followed by addition of the catalyst (10 mol%) and base (0.2 mmol, 2.0 equiv), the reaction was stirred at 100 °C (oil bath temperature) for 24 h and then cooled to room temperature. The reaction mixture was concentrated under reduced pressure and the resulting residue was purified by flash chromatography (solvent degreaser / ethyl acetate = 5:1) to provide **3a**.

### 2) Control experiments

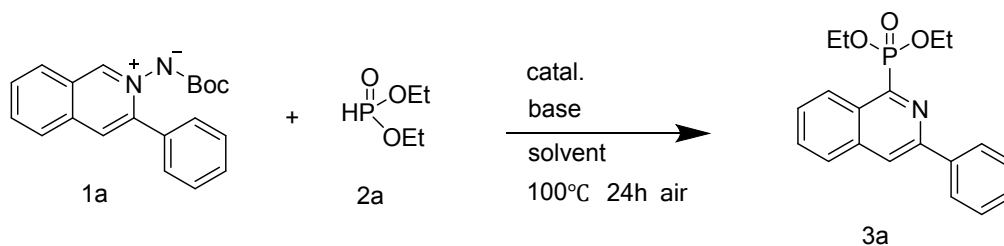

To an oven dried 10 mL vial was added (4-methylbenzoyl) (3-phenylisoquinolin-2-ium-2-yl)amide (**1p**, 0.1 mmol, 1.0 equiv) and diethyl phosphonate (**2a**, 0.2 mmol, 2.0 equiv) in 2 mL solvent, followed by addition of the catalyst (10 mol%) and base (0.2 mmol, 2.0 equiv), the reaction was stirred at 100 °C (oil bath temperature) for 24 h and then cooled to room temperature. Then capture **4p** through GC-MS analysis.

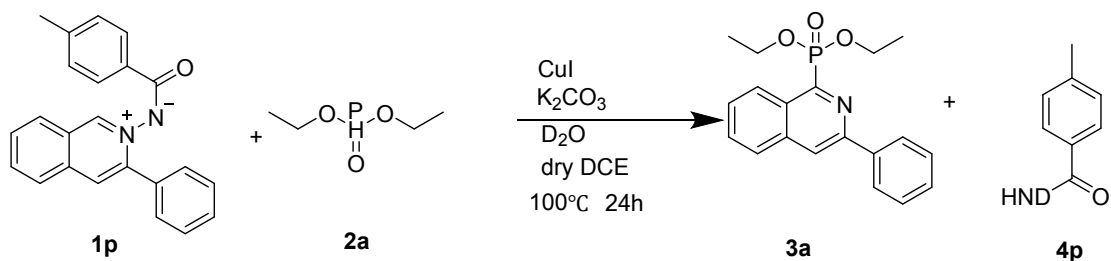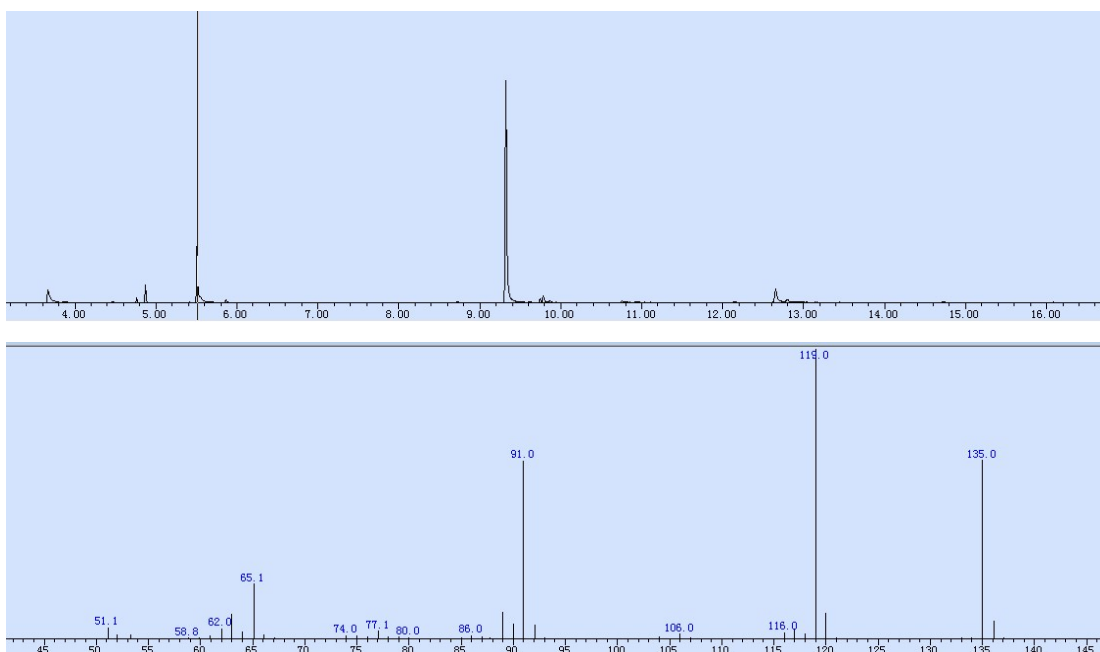

| Entry | m/z   | Abundance | Entry | m/z   | Abundance |
|-------|-------|-----------|-------|-------|-----------|
| 1     | 50.10 | 4.0       | 24    | 86.00 | 1.0       |
| 2     | 51.00 | 5.0       | 25    | 87.00 | 1.0       |

|    |       |      |    |        |       |
|----|-------|------|----|--------|-------|
| 3  | 52.10 | 2.0  | 26 | 87.90  | 0.0   |
| 4  | 53.20 | 1.0  | 27 | 89.00  | 10.0  |
| 5  | 58.70 | 0.0  | 28 | 90.10  | 6.0   |
| 6  | 60.00 | 0.0  | 29 | 91.10  | 68.0  |
| 7  | 61.00 | 1.0  | 30 | 92.10  | 6.0   |
| 8  | 62.00 | 4.0  | 31 | 93.10  | 0.0   |
| 9  | 63.00 | 10.0 | 32 | 104.00 | 1.0   |
| 10 | 64.00 | 3.0  | 33 | 105.00 | 0.0   |
| 11 | 65.10 | 21.0 | 34 | 106.00 | 2.0   |
| 12 | 66.10 | 1.0  | 35 | 107.10 | 0.0   |
| 13 | 67.00 | 0.0  | 36 | 116.00 | 2.0   |
| 14 | 67.80 | 0.0  | 37 | 117.00 | 3.0   |
| 15 | 73.10 | 0.0  | 38 | 118.00 | 2.0   |
| 16 | 74.00 | 1.0  | 39 | 119.00 | 100.0 |
| 17 | 75.00 | 1.0  | 40 | 120.00 | 9.0   |
| 18 | 76.10 | 1.0  | 41 | 121.00 | 1.0   |
| 19 | 77.00 | 3.0  | 42 | 134.10 | 0.0   |
| 20 | 78.10 | 1.0  | 43 | 135.10 | 60.0  |
| 21 | 79.00 | 1.0  | 44 | 136.00 | 6.0   |
| 22 | 80.00 | 0.0  | 45 | 137.00 | 0.0   |
| 23 | 85.00 | 1.0  |    |        |       |

### 3) HRMS (ESI) studies on copper complex **B**

To an oven dried 10 mL vial was added (tert-butoxycarbonyl) (3-phenylisoquinolin-2-ium-2-yl) amide (**1a**, 0.1 mmol, 1.0 equiv) and diethyl phosphonate (**2a**, 0.2 mmol, 2.0 equiv) in 2 mL solvent, followed by addition of the catalyst (10 mol%) and base (0.2 mmol, 2.0 equiv), the reaction was stirred at 100 °C (oil bath temperature) for 1h. Then 0.01 mL of the solution was dilute from the vial, and subjected to run ESI analysis.

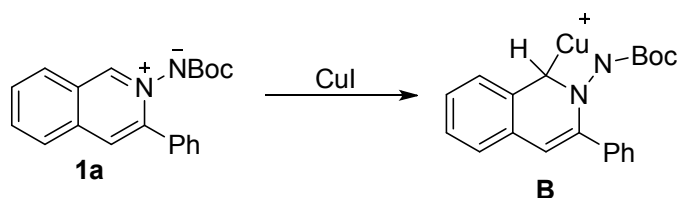

**HRMS (ESI) Calcd for C<sub>20</sub>H<sub>20</sub>CuN<sub>2</sub>O<sub>2</sub><sup>+</sup> ([B]<sup>+</sup>) 383.0804, Found: 383.0815.**

## Generic Display Report (all)

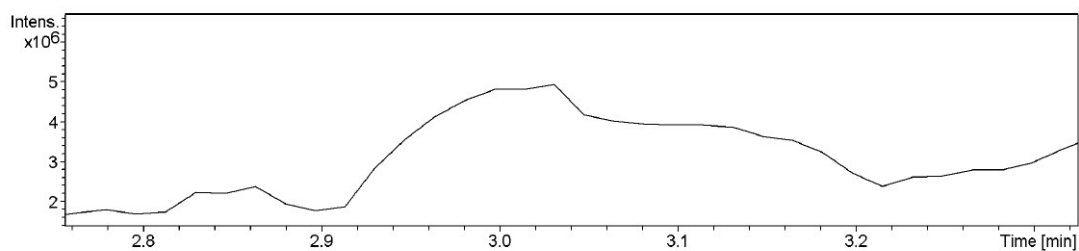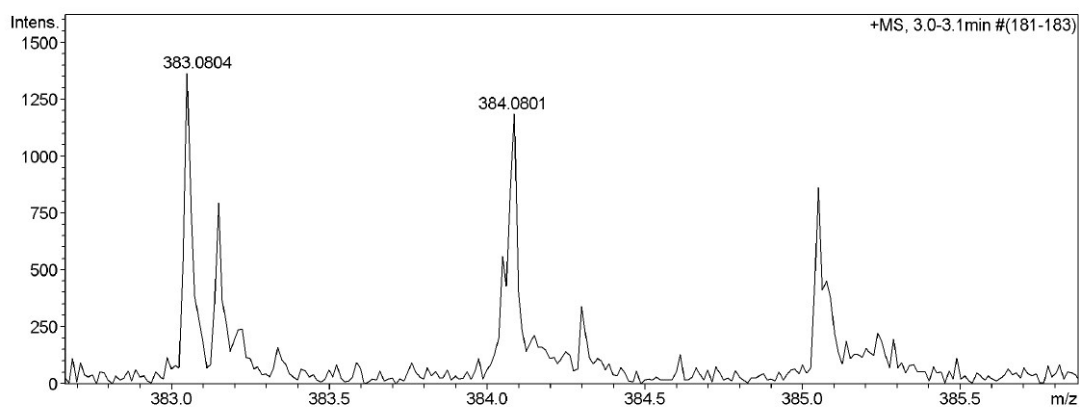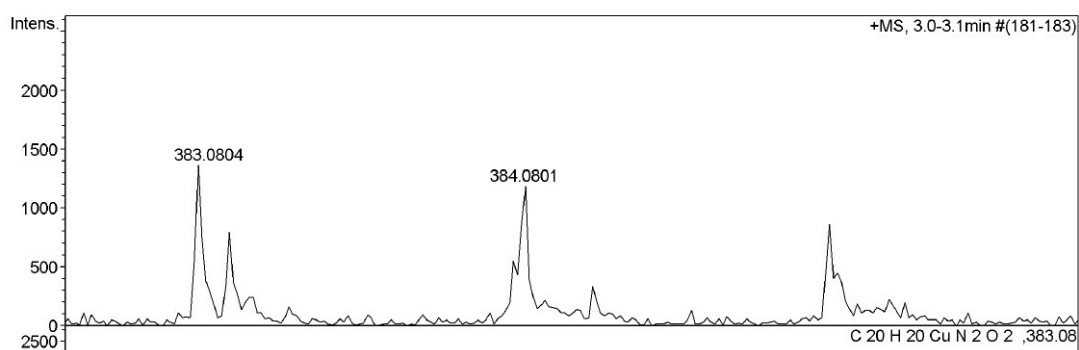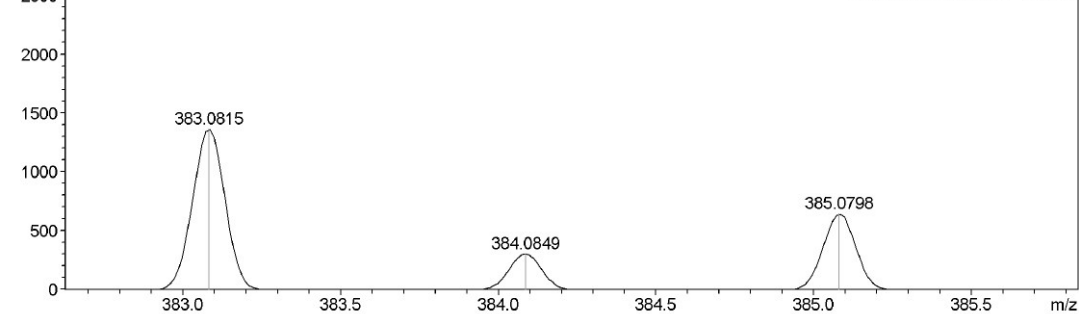

### III Characterization of products:

*diethyl (3-phenylisoquinolin-1-yl)phosphonate (3a)*<sup>[2]</sup>

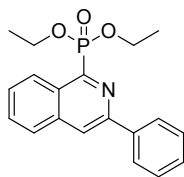

Yellow oil ( 28.0 mg, 82% yield );  $^1\text{H}$  NMR (500 MHz,  $\text{CDCl}_3$ )  $\delta$  8.92 (d,  $J$  = 8.5 Hz, 1H), 8.14–8.16 (m, 3H), 7.86 (d,  $J$  = 8.0 Hz, 1H), 7.66 (t,  $J$  = 7.0 Hz, 1H), 7.66 (t,  $J$  = 8.0 Hz, 1H), 7.49 (t,  $J$  = 7.5 Hz, 2H), 7.40 (t,  $J$  = 7.5 Hz, 1H), 4.37–4.43 (m, 4H), 1.42 (t,  $J$  = 7.5 Hz, 6H);  $^{13}\text{C}$  NMR (125 MHz,  $\text{CDCl}_3$ )  $\delta$  152.4 (d,  $^1J_{\text{C-P}}$  = 222.5 Hz), 149.8 (d,  $^3J_{\text{C-P}}$  = 25.0 Hz), 138.7 (s), 137.1 (d,  $^3J_{\text{C-P}}$  = 10.0 Hz), 130.6 (s), 128.9 (d,  $^3J_{\text{C-P}}$  = 28.8 Hz), 128.8 (s), 128.8 (s), 128.1 (s), 127.7 (d,  $^4J_{\text{C-P}}$  = 2.5 Hz), 127.1 (s), 126.9 (s), 119.2 (d,  $^3J_{\text{C-P}}$  = 5.0 Hz), 63.5 (d,  $^2J_{\text{C-P}}$  = 6.3 Hz), 16.5 (d,  $^3J_{\text{C-P}}$  = 6.3 Hz); HRMS (ESI) Calcd for  $\text{C}_{19}\text{H}_{21}\text{N}_3\text{O}_3\text{P}^+$  ( $[\text{M} + \text{H}]^+$ ) 342.1254, Found: 342.1254.

**diethyl (6-methyl-3-phenylisoquinolin-1-yl)phosphonate (3b)**

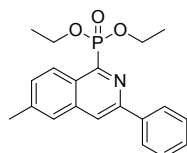

Yellow oil (26.6 mg, 75% yield);  $^1\text{H}$  NMR (500 MHz,  $\text{CDCl}_3$ )  $\delta$  8.80 (d,  $J$  = 9.0 Hz, 1H), 8.15 (d,  $J$  = 8.5 Hz, 2H), 8.09 (s, 1H), 7.65 (s, 1H), 7.46–7.51 (m, 3H), 7.41 (t,  $J$  = 8.0 Hz, 1H), 4.52–4.25 (m, 4H), 2.53 (s, 3H), 1.41 (t,  $J$  = 7.0 Hz, 6H);  $^{13}\text{C}$  NMR (125 MHz,  $\text{CDCl}_3$ )  $\delta$  151.9 (d,  $^1J_{\text{C-P}}$  = 225.0 Hz), 149.9 (d,  $^3J_{\text{C-P}}$  = 25.0 Hz), 141.1 (s), 138.9 (s), 137.5 (d,  $^3J_{\text{C-P}}$  = 11.3 Hz), 130.5 (s), 128.8 (s), 128.8 (s), 127.4 (d,  $^2J_{\text{C-P}}$  = 30.0 Hz), 126.9 (s), 126.8 (s), 126.5 (d,  $^4J_{\text{C-P}}$  = 2.5 Hz), 118.7 (d,  $^3J_{\text{C-P}}$  = 3.8 Hz), 63.5 (d,  $^2J_{\text{C-P}}$  = 6.3 Hz), 21.9 (s), 16.4 (d,  $^3J_{\text{C-P}}$  = 6.3 Hz); HRMS (ESI) Calcd for  $\text{C}_{20}\text{H}_{23}\text{NO}_4\text{P}^+$  ( $[\text{M} + \text{H}]^+$ ) 372.1359, Found: 372.1387.

**diethyl (7-methoxy-3-phenylisoquinolin-1-yl)phosphonate (3c)**

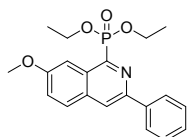

Yellow oil (23.7 mg, 64% yield);  $^1\text{H}$  NMR (500 MHz,  $\text{CDCl}_3$ )  $\delta$  8.30 (s, 1H), 8.16 – 8.10 (m, 3H), 7.77 (d,  $J$  = 8.5 Hz, 1H), 7.48 (t,  $J$  = 7.5 Hz, 2H), 7.39 (t,  $J$  = 7.5 Hz, 1H), 7.34 (d,  $J$  = 9.0 Hz, 1H), 4.45–4.33 (m, 4H), 3.99 (s, 3H), 1.42 (t,  $J$  = 7.0 Hz, 6H);  $^{13}\text{C}$  NMR (125 MHz,  $\text{CDCl}_3$ )  $\delta$  159.1 (s), 149.9 (d,  $^1J_{\text{C-P}}$  = 222.5 Hz), 148.3 (d,

$^3J_{\text{c-p}} = 25.0$  Hz), 138.8 (s), 132.9 (d,  $^3J_{\text{c-p}} = 11.3$  Hz), 130.5 (d,  $^2J_{\text{c-p}} = 28.8$  Hz), 129.2 (d,  $^4J_{\text{c-p}} = 3.8$  Hz), 128.8 (s), 128.5 (s), 126.6 (s), 124.2 (s), 119.2 (d,  $^3J_{\text{c-p}} = 5.0$  Hz), 104.3 (s), 63.4 (d,  $^2J_{\text{c-p}} = 6.3$  Hz), 55.6 (s), 16.5 (d,  $^3J_{\text{c-p}} = 6.3$  Hz); HRMS (ESI) Calcd for  $\text{C}_{21}\text{H}_{25}\text{NO}_5\text{P}^+$  ( $[\text{M} + \text{H}]^+$ ) 402.1465, Found: 402.1475.

**diethyl (6,7-dimethoxy-3-phenylisoquinolin-1-yl)phosphonate (3d)**

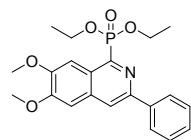

Yellow oil (22.5 mg, 56% yield);  $^1\text{H}$  NMR (500 MHz,  $\text{CDCl}_3$ )  $\delta$  8.36 (s, 1H), 8.12 (d,  $J = 8.0$  Hz, 2H), 8.04 (s, 1H), 7.47 (t,  $J = 7.5$  Hz, 2H), 7.38 (t,  $J = 7.5$  Hz, 1H), 7.12 (s, 1H), 4.40–4.35 (m, 4H), 4.08 (s, 3H), 4.01 (s, 3H), 1.41 (t,  $J = 7.0$  Hz, 6H);  $^{13}\text{C}$  NMR (125 MHz,  $\text{CDCl}_3$ )  $\delta$  153.15 (s), 150.9 (s), 148.8 (d,  $^3J_{\text{c-p}} = 25.0$  Hz), 148.8 (d,  $^1J_{\text{c-p}} = 221.2$  Hz), 139.0 (s), 134.3 (d,  $^3J_{\text{c-p}} = 10.0$  Hz), 128.7 (s), 128.4 (s), 126.5 (s), 125.8 (d,  $^2J_{\text{c-p}} = 31.3$  Hz), 118.0 (d,  $^3J_{\text{c-p}} = 3.8$  Hz), 105.3 (d,  $^4J_{\text{c-p}} = 2.5$  Hz), 105.1 (s), 63.4 (d,  $^2J_{\text{c-p}} = 6.3$  Hz), 56.1 (s), 56.0 (s), 16.4 (d,  $^3J_{\text{c-p}} = 6.3$  Hz); HRMS (ESI) Calcd for  $\text{C}_{21}\text{H}_{25}\text{NO}_5\text{P}^+$  ( $[\text{M} + \text{H}]^+$ ) 402.1465, Found: 402.1475.

**diethyl (7-phenyl-[1,3]dioxolo[4,5-g]isoquinolin-5-yl)phosphonate (3e)**

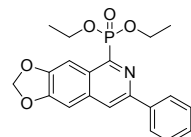

Yellow oil (34.1 mg, 92% yield);  $^1\text{H}$  NMR (500 MHz,  $\text{CDCl}_3$ )  $\delta$  8.26 (s, 1H), 8.10 (d,  $J = 7.5$  Hz, 2H), 7.98 (d,  $J = 2.0$  Hz, 1H), 7.48 (t,  $J = 7.5$  Hz, 2H), 7.40 (t,  $J = 7.0$  Hz, 1H), 7.10 (d,  $J = 2.0$  Hz, 1H), 6.08 (s, 2H), 4.39–4.35 (m, 4H), 1.41 (t,  $J = 7.0$  Hz, 6H);  $^{13}\text{C}$  NMR (125 MHz,  $\text{CDCl}_3$ )  $\delta$  151.0 (s), 149.3 (s), 148.6 (d,  $^1J_{\text{c-p}} = 222.5$  Hz), 149.1 (s), 138.8 (s), 136.0 (d,  $^3J_{\text{c-p}} = 11.3$  Hz), 128.7 (s), 128.6 (s), 126.9 (d,  $^2J_{\text{c-p}} = 28.8$  Hz), 126.6 (s), 118.9 (d,  $^4J_{\text{c-p}} = 3.8$  Hz), 103.1 (d,  $^3J_{\text{c-p}} = 5.0$  Hz), 101.9 (s), 63.4 (d,  $^2J_{\text{c-p}} = 6.3$  Hz), 29.7 (s), 16.4 (d,  $^3J_{\text{c-p}} = 6.3$  Hz); HRMS (ESI) Calcd for  $\text{C}_{20}\text{H}_{21}\text{NO}_5\text{P}^+$  ( $[\text{M} + \text{H}]^+$ ) 386.1152, Found: 386.1168.

**diethyl (3-phenyl-7-(trifluoromethyl)isoquinolin-1-yl)phosphonate (3f)**

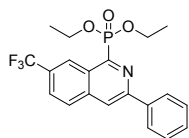

Yellow solid (17.2 mg, 42% yield); mp 110–112 °C;  $^1\text{H}$  NMR (500 MHz,  $\text{CDCl}_3$ )  $\delta$  9.28 (s, 1H), 8.24 (d,  $J = 1.5$  Hz, 1H), 8.19 (d,  $J = 8.0$  Hz, 2H), 8.04 (d,  $J = 8.0$  Hz, 1H), 7.88 (d,  $J = 8.5$  Hz, 1H), 7.54 (t,  $J = 7.5$  Hz, 2H), 7.47 (t,  $J = 7.0$  Hz, 1H), 4.47–4.38 (m, 4H), 1.45 (t,  $J = 7.0$  Hz, 6H);  $^{13}\text{C}$  NMR (125 MHz,  $\text{CDCl}_3$ )  $\delta$  154.0 (d,  $^1J_{\text{C-P}} = 222.5$  Hz), 151.9 (d,  $^3J_{\text{C-P}} = 23.8$  Hz), 138.3 (d,  $^3J_{\text{C-P}} = 10.0$  Hz), 138.0 (s), 129.5 (s), 129.5 (s), 129.0 (s), 128.9 (d,  $^3J_{\text{C-P}} = 2.5$  Hz), 127.6 (d,  $^2J_{\text{C-P}} = 28.8$  Hz), 127.1 (s), 126.3 (d,  $^4J_{\text{C-P}} = 2.5$  Hz), 125.4–125.1 (m), 124.8 (s), 122.7 (s), 118.6 (s), 63.8 (d,  $^2J_{\text{C-P}} = 6.3$  Hz), 16.4 (d,  $^3J_{\text{C-P}} = 6.3$  Hz); HRMS (ESI) Calcd for  $\text{C}_{20}\text{H}_{20}\text{F}_3\text{NO}_3\text{P}^+$  ( $[\text{M} + \text{H}]^+$ ) 410.1127, Found: 410.1127

***diethyl (3-(p-tolyl)isoquinolin-1-yl)phosphonate (3g)***

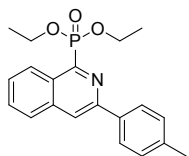

Yellow oil (30.2 mg, 85% yield);  $^1\text{H}$  NMR (500 MHz,  $\text{CDCl}_3$ )  $\delta$  8.91 (d,  $J = 8.5$  Hz, 1H), 8.13 (s, 1H), 8.06 (d,  $J = 8.0$  Hz, 2H), 7.85 (d,  $J = 8.0$  Hz, 1H), 7.64 (d,  $J = 7.0$  Hz, 1H), 7.64 (d,  $J = 7.5$  Hz, 1H), 7.30 (d,  $J = 7.5$  Hz, 2H), 4.59–4.22 (m, 4H), 2.41 (s, 3H), 1.41 (t,  $J = 7.0$  Hz, 6H);  $^{13}\text{C}$  NMR (125 MHz,  $\text{CDCl}_3$ )  $\delta$  152.3 (d,  $^1J_{\text{C-P}} = 221.2$  Hz), 150.0 (d,  $^3J_{\text{C-P}} = 25.0$  Hz), 138.8 (s), 137.1 (d,  $^3J_{\text{C-P}} = 10.0$  Hz), 136.0 (s), 130.5 (s), 129.6 (s), 128.8 (d,  $^2J_{\text{C-P}} = 30.0$  Hz), 127.9 (s), 127.6 (d,  $^4J_{\text{C-P}} = 2.5$  Hz), 127.1 (s), 126.8 (s), 118.7 (d,  $^3J_{\text{C-P}} = 3.8$  Hz), 63.5 (d,  $^2J_{\text{C-P}} = 6.3$  Hz), 21.2 (s), 16.4 (d,  $^3J_{\text{C-P}} = 6.3$  Hz); HRMS (ESI) Calcd for  $\text{C}_{20}\text{H}_{23}\text{NO}_3\text{P}^+$  ( $[\text{M} + \text{H}]^+$ ) 356.1410, Found: 356.1426.

***diethyl (3-(4-ethylphenyl)isoquinolin-1-yl)phosphonate (3h)***

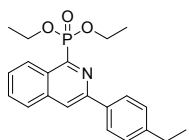

Yellow oil (25.5 mg, 67% yield);  $^1\text{H}$  NMR (500 MHz,  $\text{CDCl}_3$ )  $\delta$  8.90 (d,  $J = 8.5$  Hz, 1H), 8.17 (s, 1H), 8.10 (d,  $J = 8.0$  Hz, 2H), 7.89 (d,  $J = 8.0$  Hz, 1H), 7.70 (t,  $J = 7.0$  Hz, 1H), 7.64 (t,  $J = 7.0$  Hz, 1H), 7.35 (d,  $J = 8.0$  Hz, 2H), 4.58–4.30 (m, 4H), 2.73 (q,



$J = 7.5$  Hz, 2H), 1.42 (t,  $J = 7.0$  Hz, 6H), 1.30 (t,  $J = 8.0$  Hz, 3H);  $^{13}\text{C}$  NMR (125 MHz,  $\text{CDCl}_3$ )  $\delta$  152.3 (d,  $^1J_{\text{C-P}} = 221.3$  Hz), 150.0 (d,  $^3J_{\text{C-P}} = 25.0$  Hz), 145.2 (s), 137.1 (d,  $^3J_{\text{C-P}} = 11.3$  Hz), 136.2 (s), 130.6 (s), 128.8 (d,  $^2J_{\text{C-P}} = 30.0$  Hz), 128.4 (s), 128.0 (s), 127.6 (d,  $^4J_{\text{C-P}} = 2.5$  Hz), 127.1 (s), 126.9 (s), 118.8 (d,  $^3J_{\text{C-P}} = 3.8$  Hz), 63.5 (d,  $^2J_{\text{C-P}} = 5.0$  Hz), 28.7 (s), 16.4 (d,  $^3J_{\text{C-P}} = 6.3$  Hz), 15.5 (s); HRMS (ESI) Calcd for  $\text{C}_{21}\text{H}_{25}\text{NO}_3\text{P}^+$  ( $[\text{M} + \text{H}]^+$ ) 370.1567, Found: 370.1570.

**diethyl (3-(4-methoxyphenyl)isoquinolin-1-yl)phosphonate (3i)<sup>[2]</sup>**

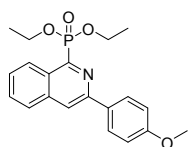

Yellow oil (34.1 mg, 92% yield);  $^1\text{H}$  NMR (500 MHz,  $\text{CDCl}_3$ )  $\delta$  8.90 (d,  $J = 8.0$  Hz, 1H), 8.10 (d,  $J = 8.5$  Hz, 2H), 8.07 (s, 1H), 7.83 (d,  $J = 8.5$  Hz, 1H), 7.65 (t,  $J = 7.0$  Hz, 1H), 7.59 (t,  $J = 7.5$  Hz, 1H), 7.01 (d,  $J = 8.5$  Hz, 2H), 4.58–4.27 (m, 4H), 3.84 (s, 3H), 1.42 (t,  $J = 7.1$  Hz, 6H);  $^{13}\text{C}$  NMR (125MHz,  $\text{CDCl}_3$ )  $\delta$  160.4 (s), 152.2 (d,  $^1J_{\text{C-P}} = 221.2$  Hz), 149.7 (d,  $^3J_{\text{C-P}} = 25.0$  Hz), 137.2 (d,  $^3J_{\text{C-P}} = 11.2$  Hz), 131.3 (s), 130.5 (s), 128.6 (d,  $^2J_{\text{C-P}} = 28.7$  Hz), 128.1 (s), 127.7 (s), 127.5 (d,  $^4J_{\text{C-P}} = 2.5$  Hz), 127.0 (s), 118.0 (d,  $^3J_{\text{C-P}} = 3.7$  Hz), 114.2 (s), 63.4 (d,  $^2J_{\text{C-P}} = 6.3$  Hz), 55.3 (s), 16.4 (d,  $^3J_{\text{C-P}} = 6.3$  Hz).

**diethyl (3-(4-cyanophenyl)isoquinolin-1-yl)phosphonate (3j)**

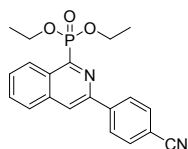

Yellow solid (7.7 mg, 21% yield); mp 137–140 °C;  $^1\text{H}$  NMR (500 MHz,  $\text{CDCl}_3$ )  $\delta$  8.93 (d,  $J = 8.4$  Hz, 1H), 8.48–8.18 (m, 3H), 7.96 (d,  $J = 8.0$  Hz, 1H), 7.81–7.74 (m, 3H), 7.73 (t,  $J = 7.5$  Hz, 1H), 4.69–4.25 (m, 4H), 1.44 (t,  $J = 7.0$  Hz, 6H).  $^{13}\text{C}$  NMR (125 MHz,  $\text{CDCl}_3$ )  $\delta$  153.13 (d,  $^1J_{\text{C-P}} = 223.2$  Hz), 147.57 (d,  $^3J_{\text{C-P}} = 25.0$  Hz), 142.88 (s), 136.83 (d,  $^3J_{\text{C-P}} = 11.3$  Hz), 132.63 (s), 131.12 (s), 129.27 (d,  $^2J_{\text{C-P}} = 28.8$  Hz), 129.07 (s), 127.93 (d,  $^4J_{\text{C-P}} = 2.5$  Hz), 127.33 (s), 127.27 (s), 120.41 (d,  $^3J_{\text{C-P}} = 3.8$  Hz), 118.80 (s), 112.26 (s), 63.53 (d,  $^2J_{\text{C-P}} = 6.3$  Hz), 16.46 (d,  $^3J_{\text{C-P}} = 6.3$  Hz); HRMS (ESI) Calcd for  $\text{C}_{20}\text{H}_{20}\text{N}_2\text{O}_3\text{P}^+$  ( $[\text{M} + \text{H}]^+$ ) 367.1206, Found: 370.1570.

**diethyl (3-(o-tolyl)isoquinolin-1-yl)phosphonate (3k)**

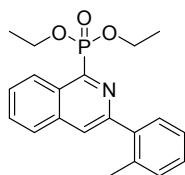

Yellow oil (16.0 mg, 45% yield);  $^1\text{H}$  NMR (500 MHz,  $\text{CDCl}_3$ )  $\delta$  9.28 (s, 1H), 8.24 (s, 1H), 8.19 (d,  $J = 7.5$  Hz, 2H), 8.04 (d,  $J = 8.0$  Hz, 1H), 7.88 (d,  $J = 8.5$  Hz, 1H), 7.54 (t,  $J = 7.5$  Hz, 2H), 7.47 (t,  $J = 7.0$  Hz, 1H), 4.47–4.38 (m, 4H), 1.45 (t,  $J = 7.0$  Hz, 6H);  $^{13}\text{C}$  NMR (125 MHz,  $\text{CDCl}_3$ )  $\delta$  154.0 (d,  $^1J_{\text{C-P}} = 222.5$  Hz), 151.9 (d,  $^3J_{\text{C-P}} = 23.8$  Hz), 138.3 (d,  $^3J_{\text{C-P}} = 10.0$  Hz), 138.0 (s), 129.5 (s), 129.0 (s), 128.9 (d,  $^3J_{\text{C-P}} = 2.5$  Hz), 127.6 (d,  $^2J_{\text{C-P}} = 28.8$  Hz), 127.1 (s), 126.3 (d,  $^3J_{\text{C-P}} = 2.5$  Hz), 125.3 (d,  $^3J_{\text{C-P}} = 5.0$  Hz), 124.8 (s), 122.7 (s), 118.6 (d,  $^4J_{\text{C-P}} = 3.7$  Hz), 63.8 (d,  $^2J_{\text{C-P}} = 6.3$  Hz), 29.7 (s), 16.4 (d,  $^3J_{\text{C-P}} = 6.3$  Hz); HRMS (ESI) Calcd for  $\text{C}_{20}\text{H}_{23}\text{NO}_3\text{P}^+$  ( $[\text{M} + \text{H}]^+$ ) 356.1410, Found: 356.1417.

**diethyl (3-(2-methoxyphenyl)isoquinolin-1-yl)phosphonate (3l)**

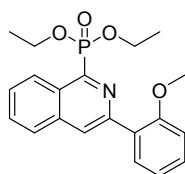

Yellow oil (19.3 mg, 52% yield);  $^1\text{H}$  NMR (500 MHz,  $\text{CDCl}_3$ )  $\delta$  8.91 (d,  $J = 8.5$  Hz, 1H), 8.44 (s, 1H), 8.08 (d,  $J = 7.5$  Hz, 1H), 7.86 (d,  $J = 7.5$  Hz, 1H), 7.71–7.56 (m, 2H), 7.36 (t,  $J = 8.0$  Hz, 1H), 7.11 (t,  $J = 7.5$  Hz, 1H), 7.01 (d,  $J = 8.0$  Hz, 1H), 4.63–4.22 (m, 4H), 3.87 (s, 3H), 1.39 (t,  $J = 7.0$  Hz, 6H);  $^{13}\text{C}$  NMR (125 MHz,  $\text{CDCl}_3$ )  $\delta$  157.4 (s), 151.8 (d,  $^1J_{\text{C-P}} = 222.5$  Hz), 147.9 (d,  $^3J_{\text{C-P}} = 25.0$  Hz), 136.6 (d,  $^3J_{\text{C-P}} = 11.3$  Hz), 131.5 (s), 130.3 (s), 129.8 (s), 128.5 (d,  $^2J_{\text{C-P}} = 30.0$  Hz), 128.1 (s), 128.0 (s), 127.9 (d,  $^4J_{\text{C-P}} = 2.5$  Hz), 126.8 (s), 124.3 (d,  $^3J_{\text{C-P}} = 3.8$  Hz), 121.0 (s), 111.6 (s), 63.4 (d,  $^2J_{\text{C-P}} = 6.3$  Hz), 55.6 (s), 16.4 (d,  $^3J_{\text{C-P}} = 6.3$  Hz); HRMS (ESI) Calcd for  $\text{C}_{20}\text{H}_{23}\text{NO}_4\text{P}^+$  ( $[\text{M} + \text{H}]^+$ ) 372.1359, Found: 372.1386.

**diethyl (3-(thiophen-2-yl)isoquinolin-1-yl)phosphonate (3m)**

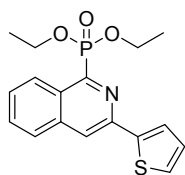

Black oil (25.6 mg, 65% yield);  $^1\text{H}$  NMR (500 MHz,  $\text{CDCl}_3$ )  $\delta$  8.86 (d,  $J = 8.5$  Hz, 1H), 8.05 (d,  $J = 2.5$  Hz, 1H), 7.84 (d,  $J = 8.5$  Hz, 1H), 7.66–7.69 (m, 2H), 7.60 (t,  $J = 7.5$  Hz, 1H), 7.40 (d,  $J = 5.0$  Hz, 1H), 7.14 (d,  $J = 4.5$  Hz, 1H), 4.57–4.30 (m, 4H), 1.44 (t,  $J = 7.0$  Hz, 6H);  $^{13}\text{C}$  NMR (125 MHz,  $\text{CDCl}_3$ )  $\delta$  152.6 (d,  $^1J_{\text{C-P}} = 220.0$  Hz), 145.5 (d,  $^3J_{\text{C-P}} = 25.0$  Hz), 144.6 (s), 136.9 (d,  $^3J_{\text{C-P}} = 10.0$  Hz), 130.9 (s), 128.8 (d,  $^2J_{\text{C-P}} = 28.8$  Hz), 128.2 (s), 127.9 (s), 127.4 (d,  $^4J_{\text{C-P}} = 2.5$  Hz), 127.4 (s), 127.3 (s), 124.2 (s), 117.0 (d,  $^3J_{\text{C-P}} = 3.8$  Hz), 63.8 (d,  $^2J_{\text{C-P}} = 6.3$  Hz), 16.5 (d,  $^3J_{\text{C-P}} = 6.3$  Hz); HRMS (ESI) Calcd for  $\text{C}_{17}\text{H}_{19}\text{NO}_3\text{PS}^+$  ( $[\text{M} + \text{H}]^+$ ) 348.0818, Found: 348.0826.

**diethyl (3-butylisoquinolin-1-yl)phosphonate (3n)**

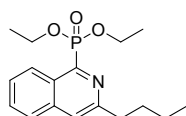

Yellow oil (25.7 mg, 80% yield);  $^1\text{H}$  NMR (500 MHz,  $\text{CDCl}_3$ )  $\delta$  8.87 (d,  $J = 8.5$  Hz, 1H), 7.77 (d,  $J = 8.0$  Hz, 1H), 7.65 (t,  $J = 7.0$  Hz, 1H), 7.61–7.56 (m, 2H), 4.60–4.23 (m, 4H), 2.99 (t,  $J = 7.5$  Hz, 2H), 2.00–1.56 (m, 2H), 1.42–1.38 (m, 8H), 0.95 (t,  $J = 7.5$  Hz, 3H);  $^{13}\text{C}$  NMR (125 MHz,  $\text{CDCl}_3$ )  $\delta$  154.9 (d,  $^3J_{\text{C-P}} = 25.0$  Hz), 151.8 (d,  $^1J_{\text{C-P}} = 221.3$  Hz), 136.8 (d,  $^3J_{\text{C-P}} = 11.3$  Hz), 130.2 (s), 128.3 (d,  $^2J_{\text{C-P}} = 28.8$  Hz), 127.3 (s), 126.9 (s), 126.8 (d,  $^4J_{\text{C-P}} = 2.5$  Hz), 121.2 (d,  $^3J_{\text{C-P}} = 4.1$  Hz), 63.2 (d,  $^2J_{\text{C-P}} = 6.3$  Hz), 37.4 (s), 31.8 (s), 22.3 (s), 16.3 (d,  $^3J_{\text{C-P}} = 6.3$  Hz), 13.9 (s); (ESI) Calcd for  $\text{C}_{17}\text{H}_{24}\text{NO}_3\text{P}^+$  ( $[\text{M} + \text{H}]^+$ ) 322.1567, Found: 322.1582.

**dimethyl (3-phenylisoquinolin-1-yl)phosphonate (3o)**

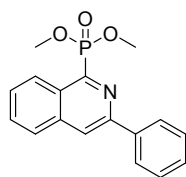

Yellow oil (23.2 mg, 74% yield);  $^1\text{H}$  NMR (500 MHz,  $\text{CDCl}_3$ )  $\delta$  8.86 (d,  $J = 8.0$  Hz, 1H), 8.26–8.12 (m, 3H), 7.88 (d,  $J = 7.5$  Hz, 1H), 7.68 (t,  $J = 7.0$  Hz, 1H), 7.64 (t,  $J = 8.0$  Hz, 1H), 7.50 (t,  $J = 7.0$  Hz, 2H), 7.42 (t,  $J = 7.0$  Hz, 1H), 4.03 (s, 3H), 4.01 (s, 3H);  $^{13}\text{C}$  NMR (125 MHz,  $\text{CDCl}_3$ )  $\delta$  151.6 (d,  $^1J_{\text{C-P}} = 222.5$  Hz), 149.9 (d,  $^3J_{\text{C-P}} = 25.0$  Hz), 138.6 (s), 137.1 (d,  $^3J_{\text{C-P}} = 11.3$  Hz), 130.8 (s), 128.9 (s), 128.9 (s), 128.4 (d,  $^2J_{\text{C-P}} = 30.0$  Hz), 128.3 (s), 127.7 (d,  $^4J_{\text{C-P}} = 2.5$  Hz), 126.9 (s), 126.9 (s), 119.4 (d,  $^3J_{\text{C-P}} = 5.0$  Hz).

Hz), 54.1 (d,  $^2J_{\text{c-p}} = 6.3$  Hz); HRMS (ESI) Calcd for  $\text{C}_{17}\text{H}_{17}\text{NO}_3\text{P}^+$  ( $[\text{M} + \text{H}]^+$ ) 314.0941, Found: 314.0936.

***dibutyl (3-phenylisoquinolin-1-yl)phosphonate (3p)***

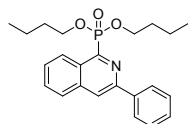

Yellow oil (34.6 mg, 87% yield);  $^1\text{H}$  NMR (500 MHz,  $\text{CDCl}_3$ )  $\delta$  8.92 (d,  $J = 8.5$  Hz, 1H), 8.16–8.17 (m, 3H), 7.88 (d,  $J = 8.0$  Hz, 1H), 7.69 (t,  $J = 7.0$  Hz, 1H), 7.64 (t,  $J = 8.5$  Hz, 1H), 7.50 (t,  $J = 7.5$  Hz, 2H), 7.42 (t,  $J = 7.5$  Hz, 1H), 4.49–4.15 (m, 4H), 2.04–1.62 (m, 4H), 1.45 (dq,  $J = 15.0, 7.5$  Hz, 4H), 0.91 (t,  $J = 7.5$  Hz, 6H);  $^{13}\text{C}$  NMR (125 MHz,  $\text{CDCl}_3$ )  $\delta$  152.6 (d,  $^1J_{\text{c-p}} = 221.3$  Hz), 149.9 (d,  $^2J_{\text{c-p}} = 23.8$  Hz), 138.7 (s), 137.1 (d,  $^3J_{\text{c-p}} = 11.3$  Hz), 130.6 (s), 129.1 (s), 128.8 (s), 128.8 (s), 128.1 (s), 127.7 (d,  $^4J_{\text{c-p}} = 2.5$  Hz), 127.2 (s), 126.9 (s), 119.1 (d,  $^3J_{\text{c-p}} = 3.8$  Hz), 67.2 (d,  $^2J_{\text{c-p}} = 6.3$  Hz), 32.6 (d,  $^3J_{\text{c-p}} = 6.3$  Hz), 18.8 (s), 13.6 (s); HRMS (ESI) Calcd for  $\text{C}_{23}\text{H}_{29}\text{NO}_3\text{P}^+$  ( $[\text{M} + \text{H}]^+$ ) 396.1880, Found: 398.1896.

***dibenzyl (3-phenylisoquinolin-1-yl)phosphonate (3q)***

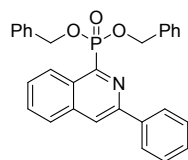

Yellow oil (39.1 mg, 84% yield);  $^1\text{H}$  NMR (500 MHz,  $\text{CDCl}_3$ )  $\delta$  8.89 (d,  $J = 8.5$  Hz, 1H), 8.18 (s, 1H), 8.10 (d,  $J = 7.0$  Hz, 2H), 7.89 (d,  $J = 8.0$  Hz, 1H), 7.69 (t,  $J = 7.0$  Hz, 1H), 7.61 (t,  $J = 8.0$  Hz, 1H), 7.46 (t,  $J = 7.0$  Hz, 2H), 7.43–7.35 (m, 5H), 7.30–7.27 (m, 6H), 5.41–5.32 (m, 4H);  $^{13}\text{C}$  NMR (125 MHz,  $\text{CDCl}_3$ )  $\delta$  152.1 (d,  $^1J_{\text{c-p}} = 225.5$  Hz), 150.0 (d,  $^3J_{\text{c-p}} = 25.0$  Hz), 138.6 (s), 137.1 (d,  $^3J_{\text{c-p}} = 10.8$  Hz), 136.2 (d,  $^3J_{\text{c-p}} = 6.6$  Hz), 130.7 (s), 129.1 (s), 128.9 (s), 128.8 (s), 128.5 (s), 128.3 (s), 128.2 (s), 127.9 (s), 127.7 (d,  $^4J_{\text{c-p}} = 2.5$  Hz), 127.1 (s), 127.0 (s), 119.4 (d,  $^3J_{\text{c-p}} = 3.8$  Hz), 68.9 (d,  $^3J_{\text{c-p}} = 6.3$  Hz); HRMS (ESI) Calcd for  $\text{C}_{29}\text{H}_{25}\text{NO}_3\text{P}^+$  ( $[\text{M} + \text{H}]^+$ ) 466.1567, Found: 466.1576.

## IV References:

1. (a) V.-A. Peshkov, O.-P. Pereshivko, V.-H. Sofie, D.-S. Ermolat, V.-V. Erik,

- synthesis*,. 2011, **20**, 3371–3374. (b) Z. -L. Zhou, Y. -L. Liu, J. -L. Song and C. -L. Deng, *Synthesis*,. 2016, **48**, 2057-2064.
2. X.-X. Yu, Q.-P. Ding, Z.-Y Chen, J. Wu, *Tetrahedron Letters*,. 2009, **50** 4279–4282

# **V $^1\text{H}$ and $^{13}\text{C}$ NMR Spectra:**

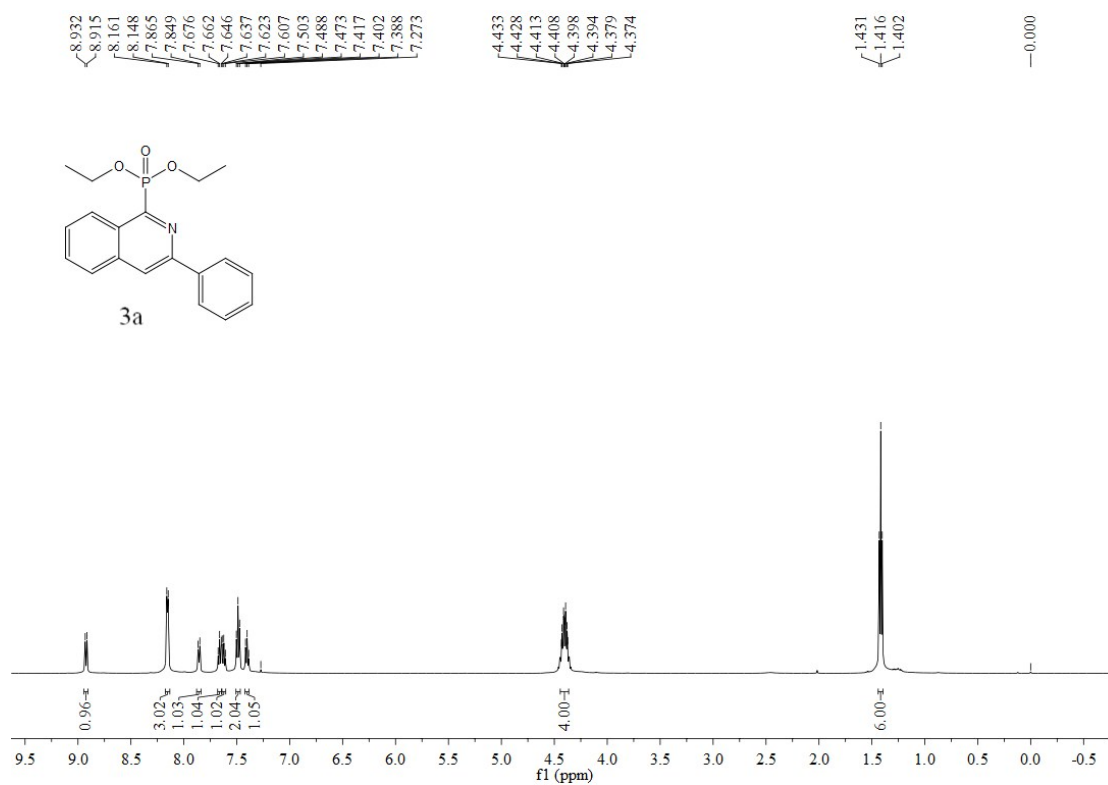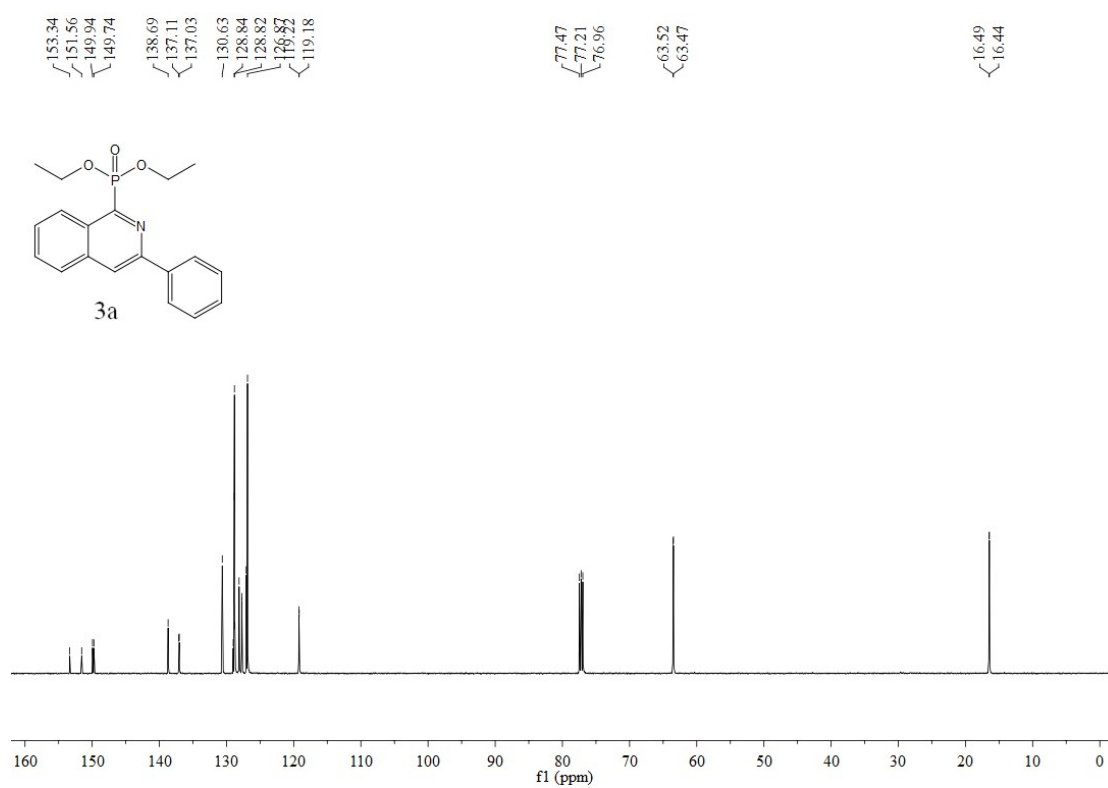

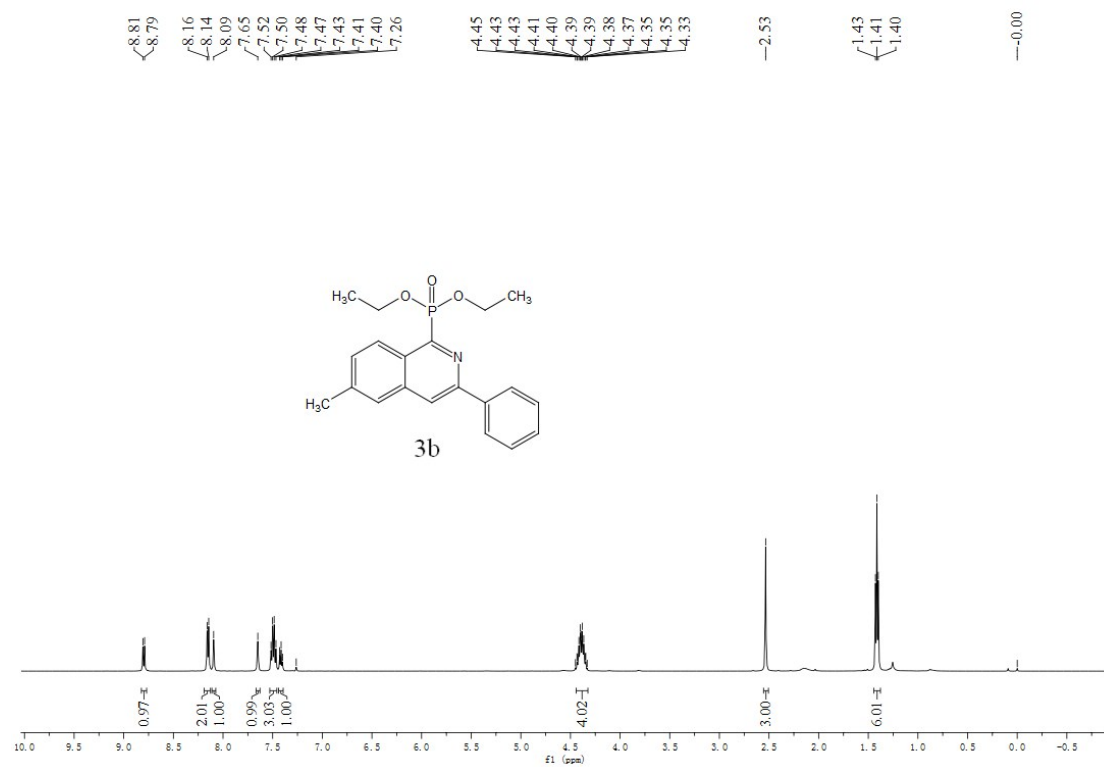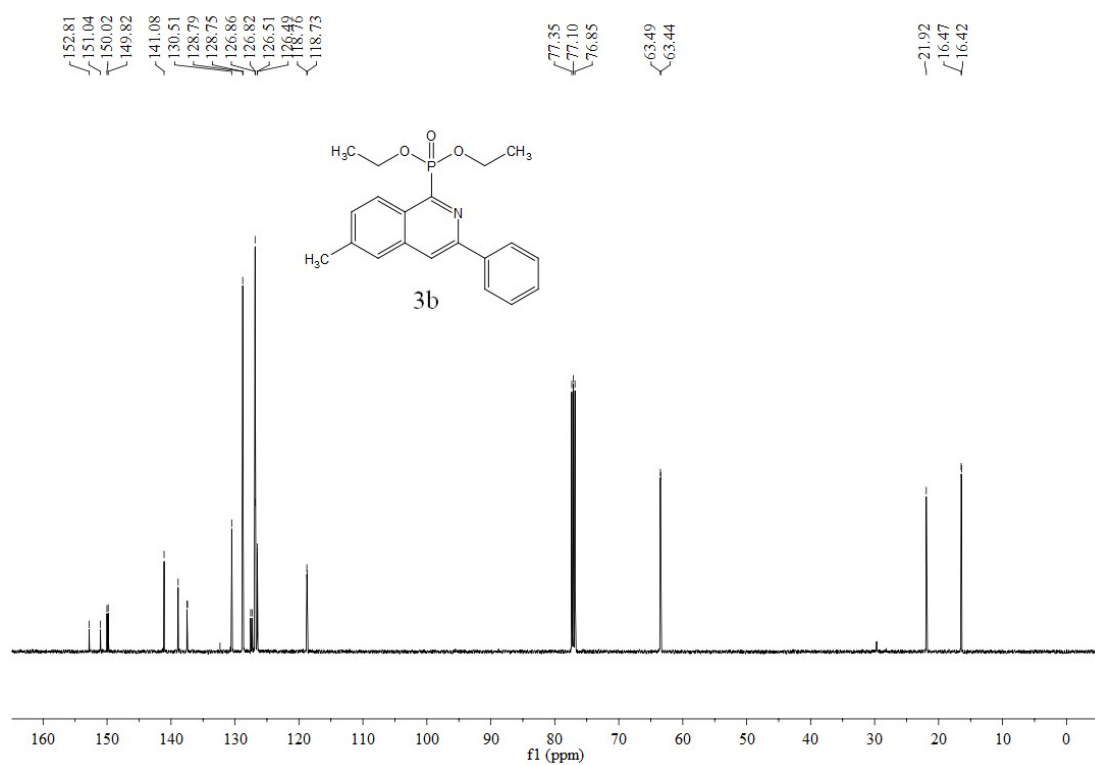

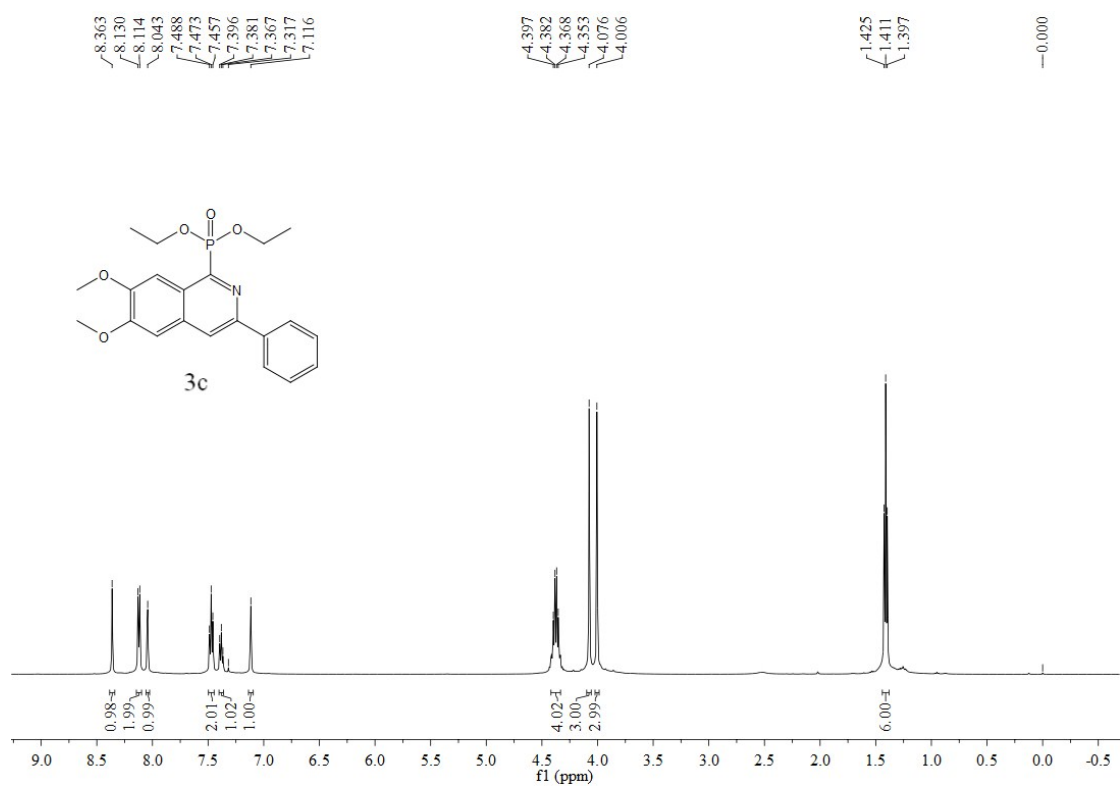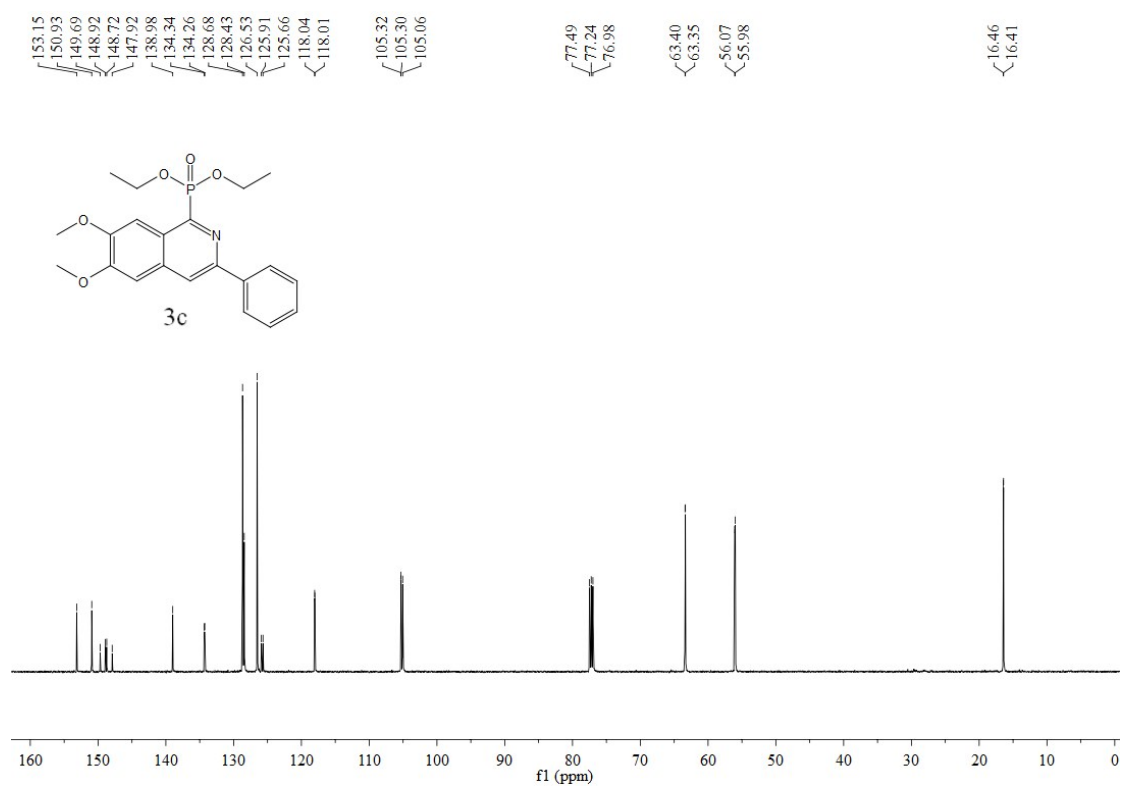



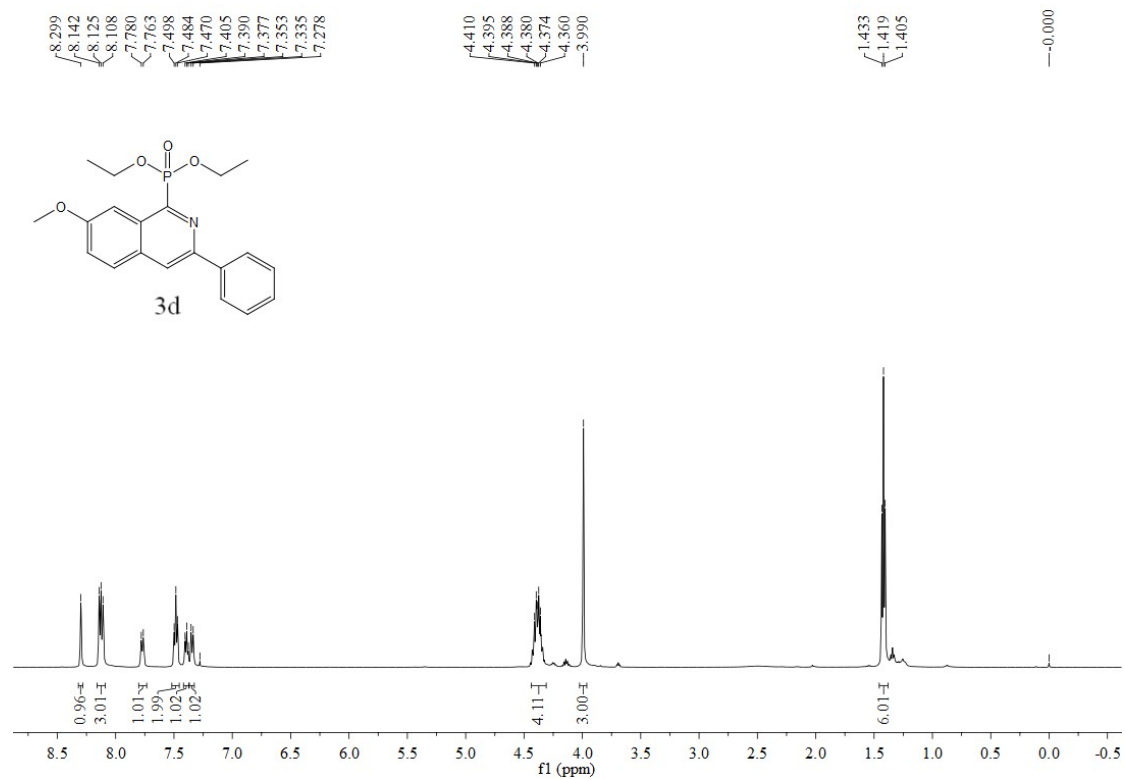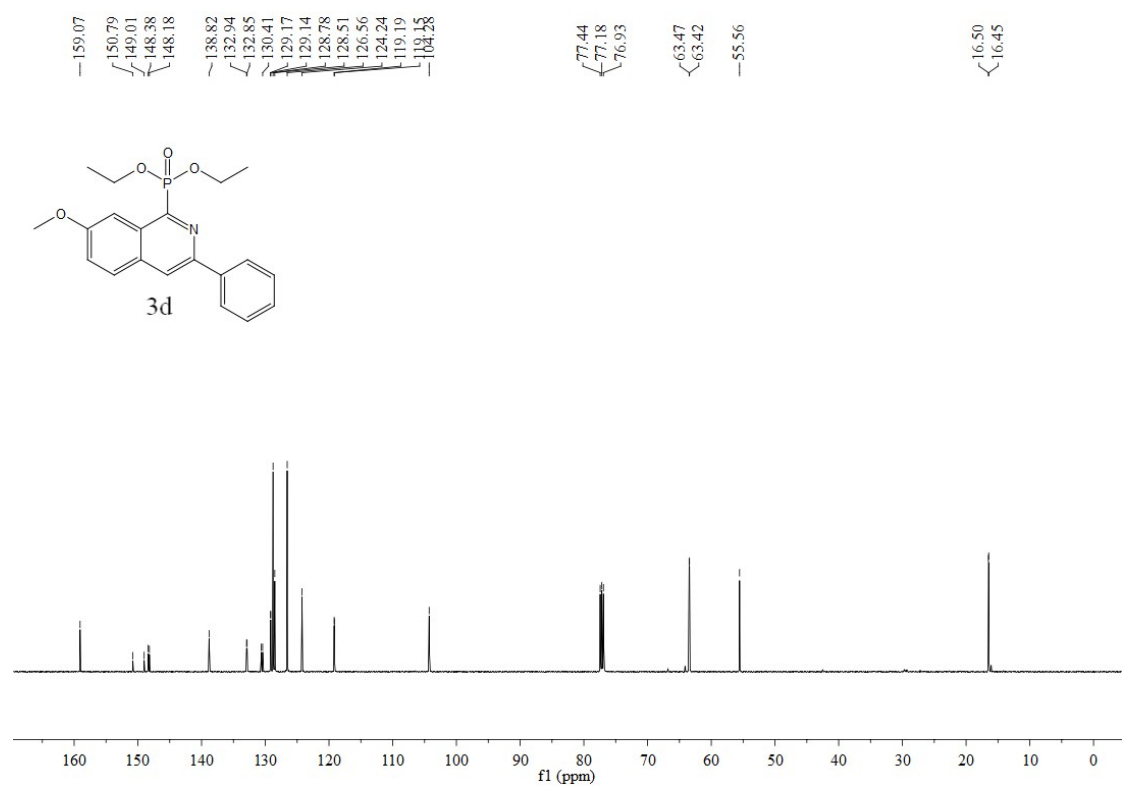

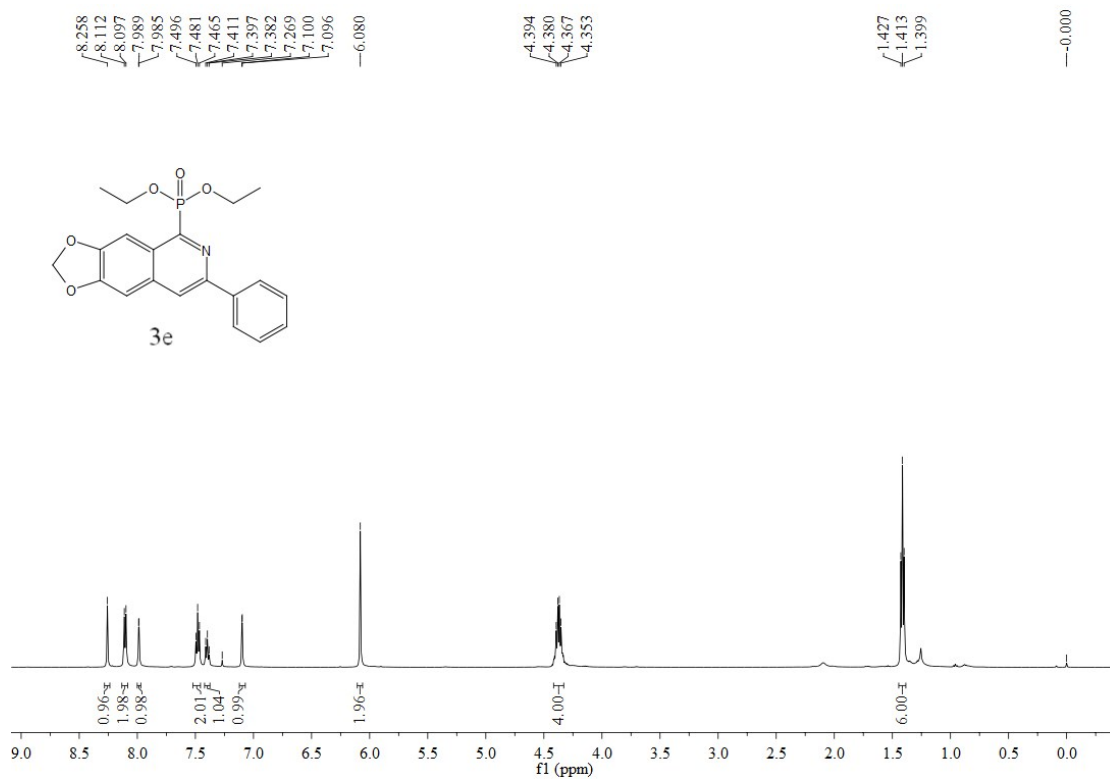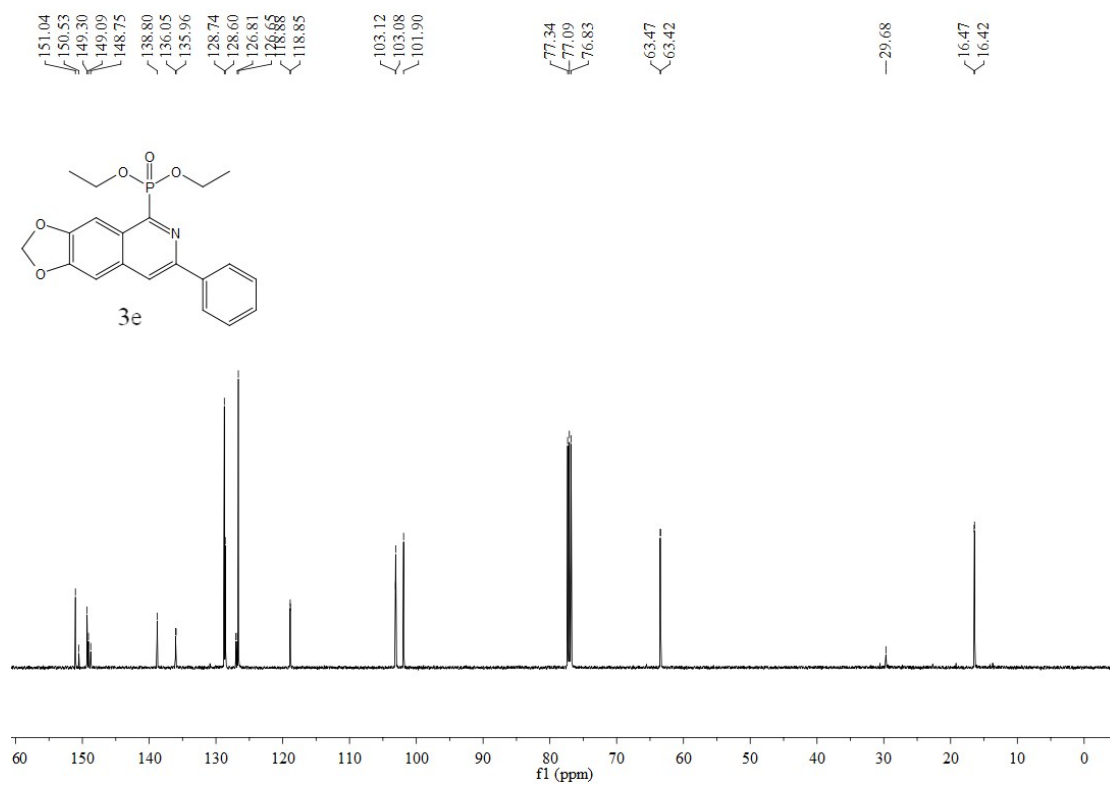

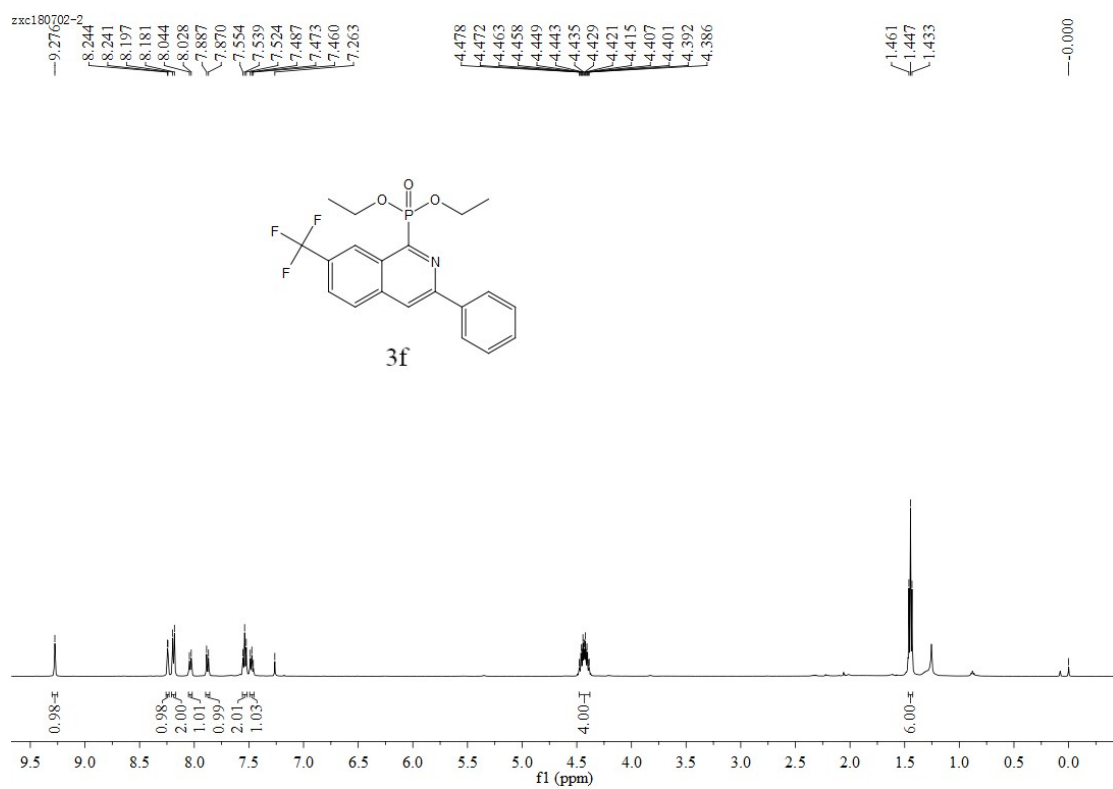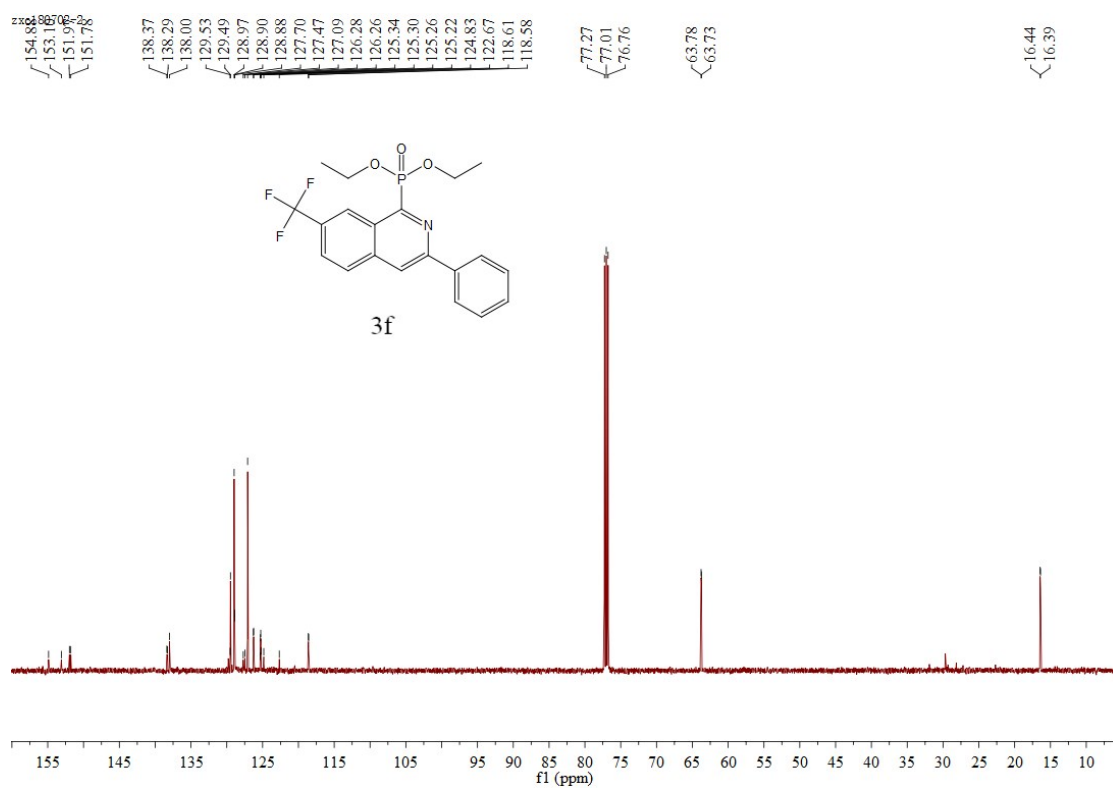

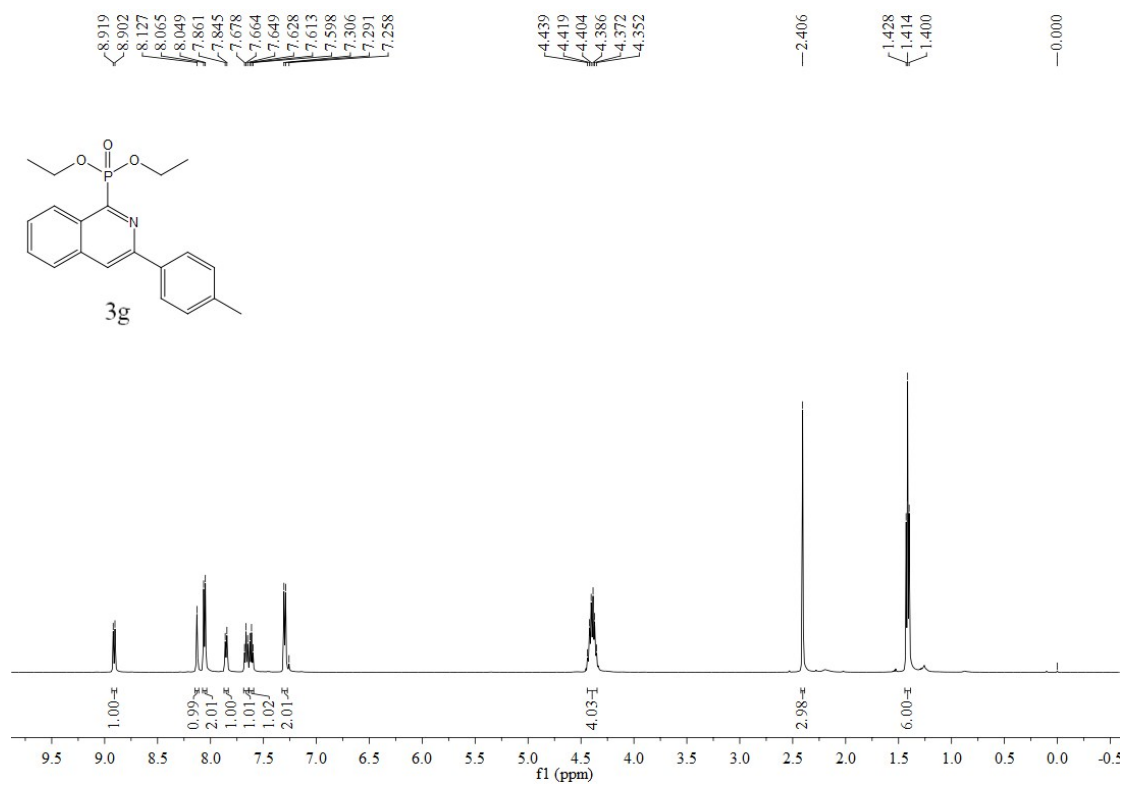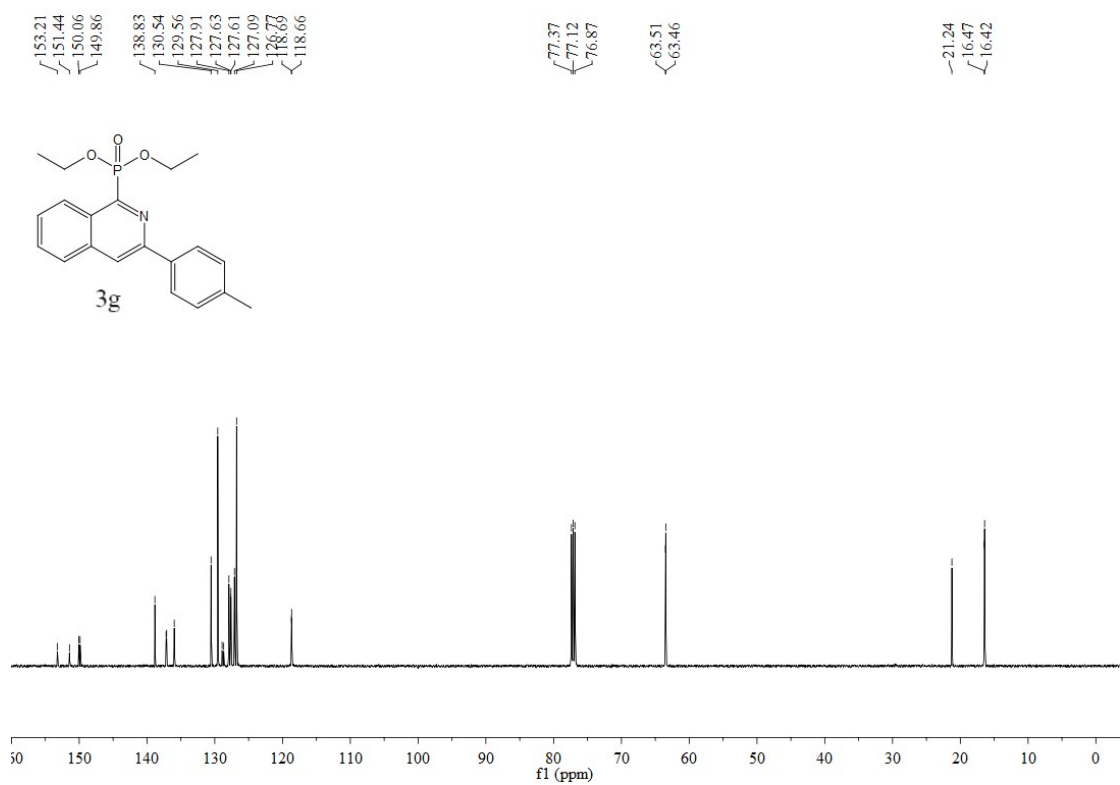

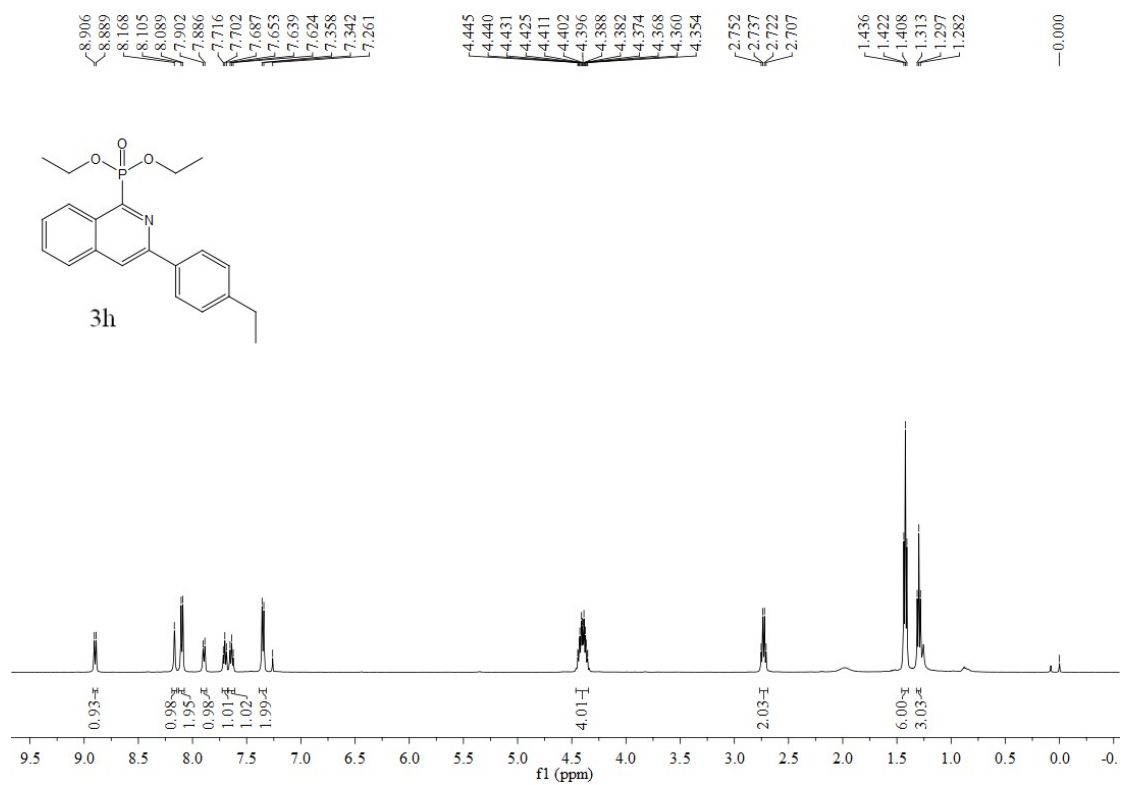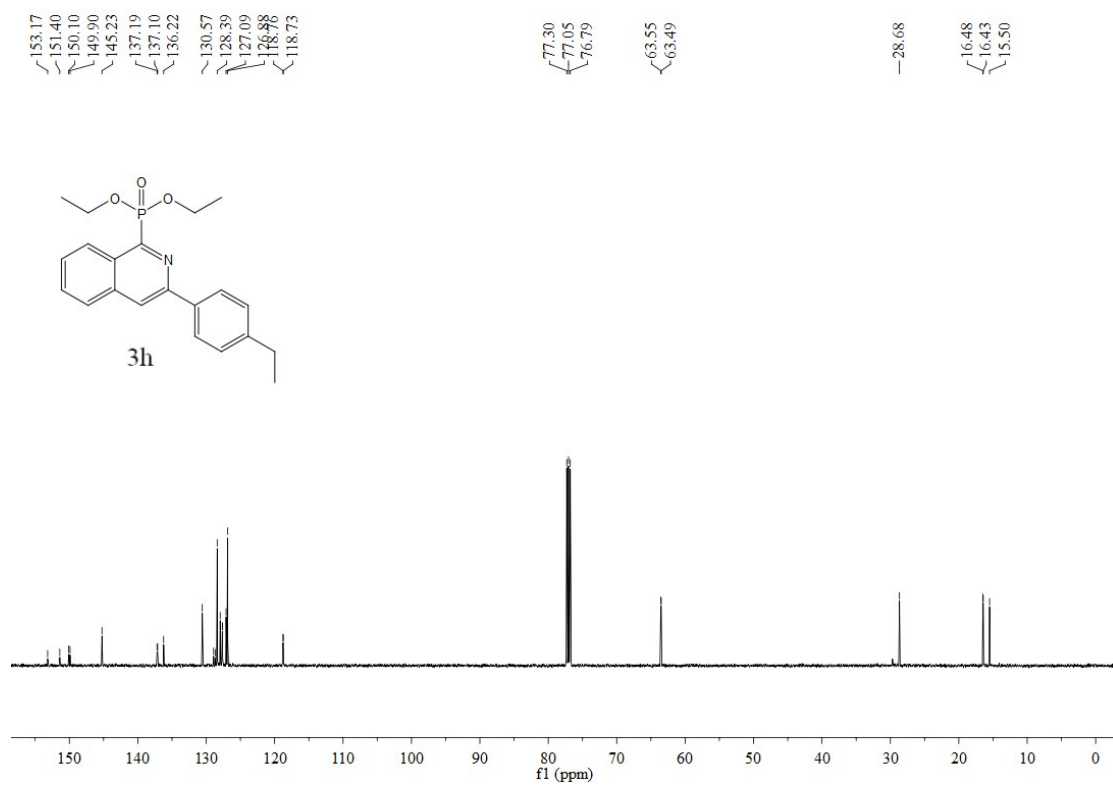

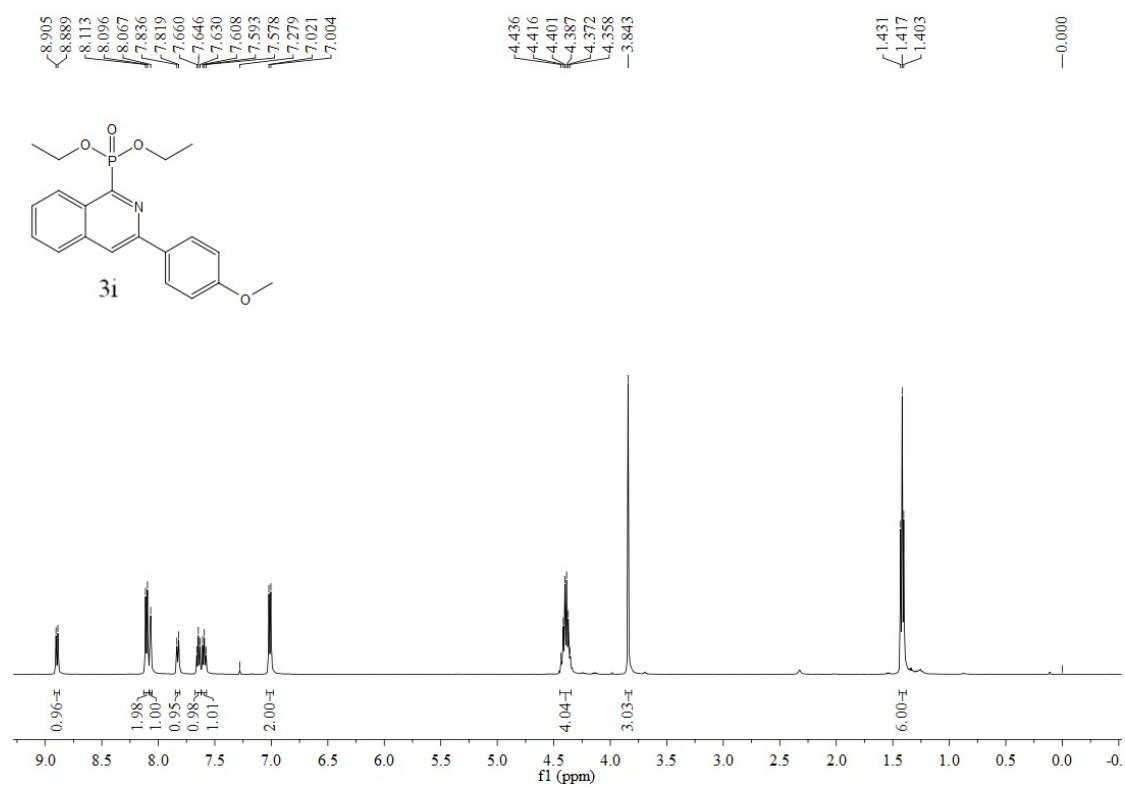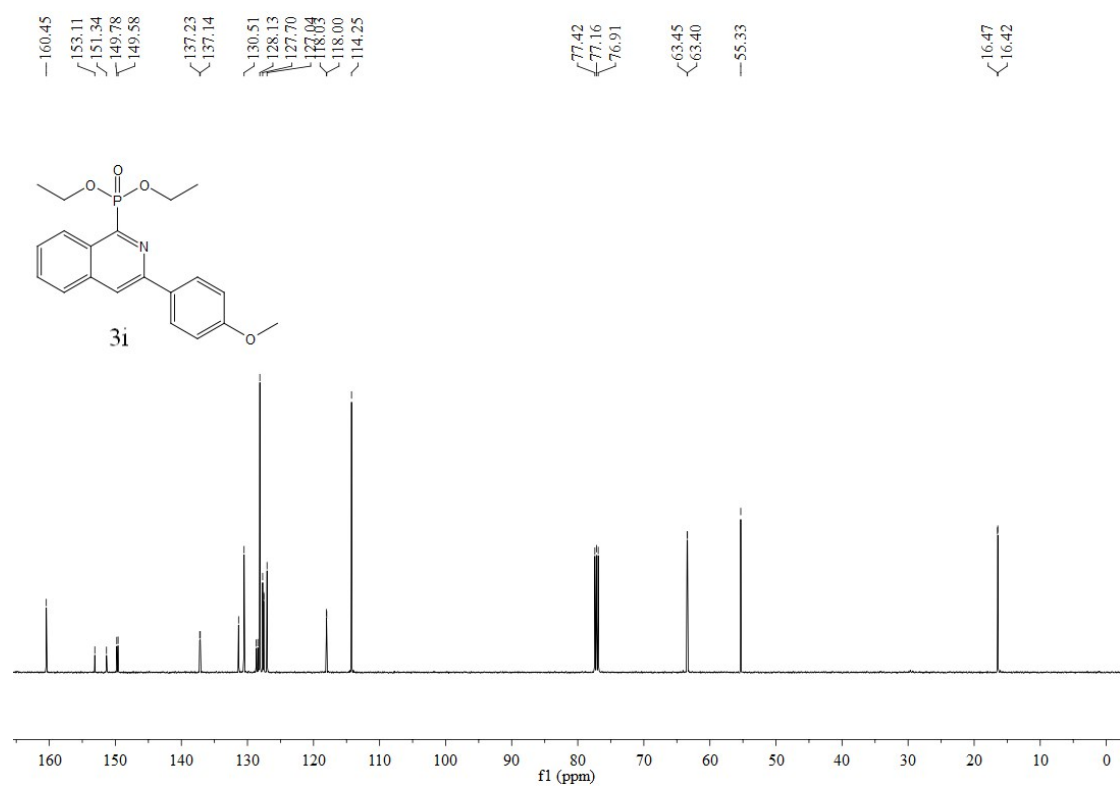

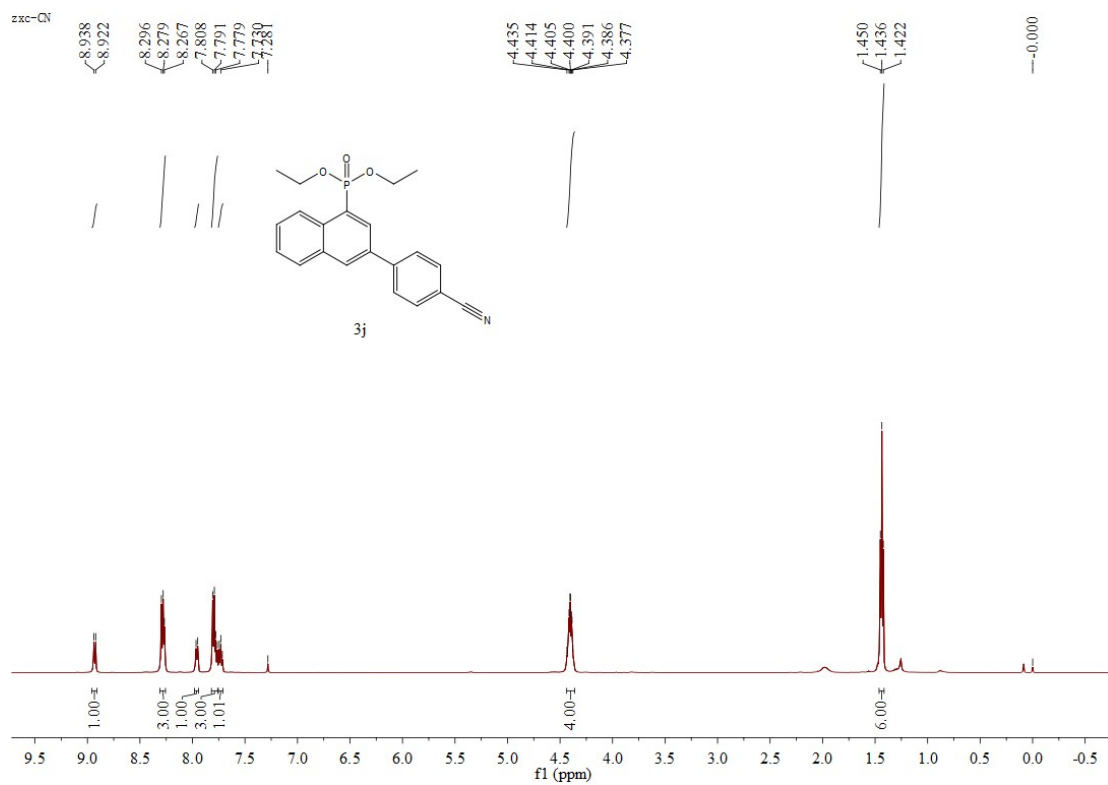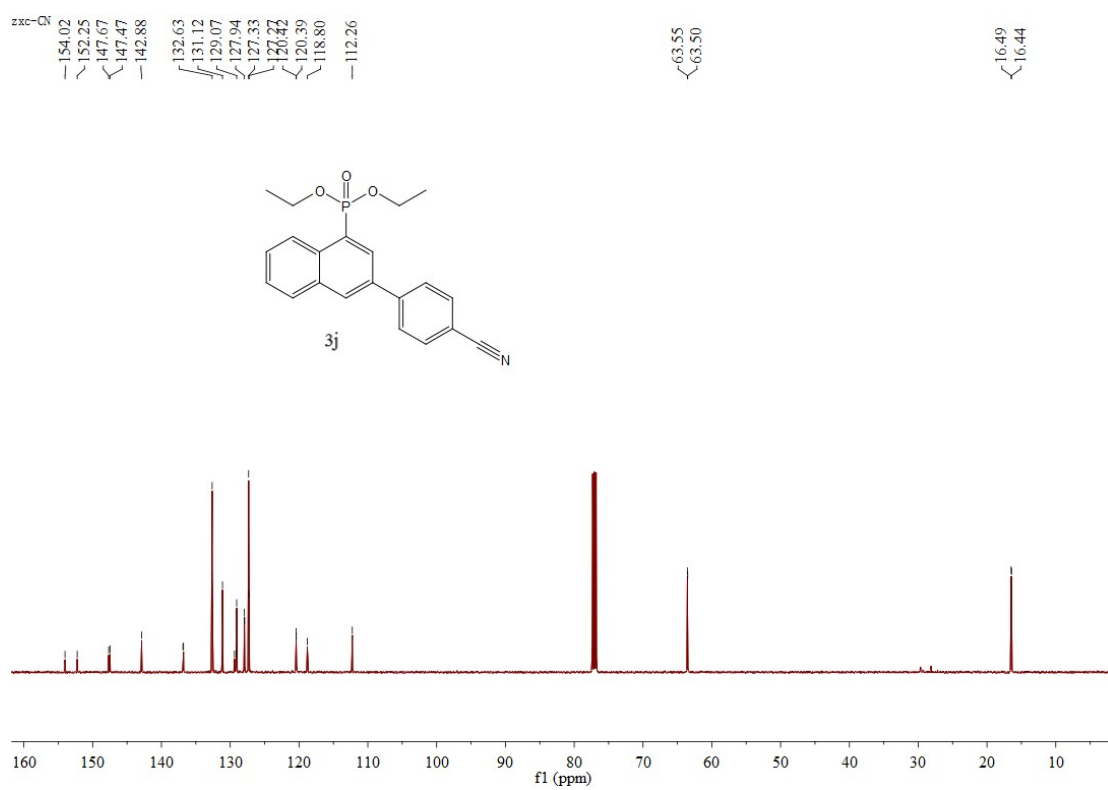

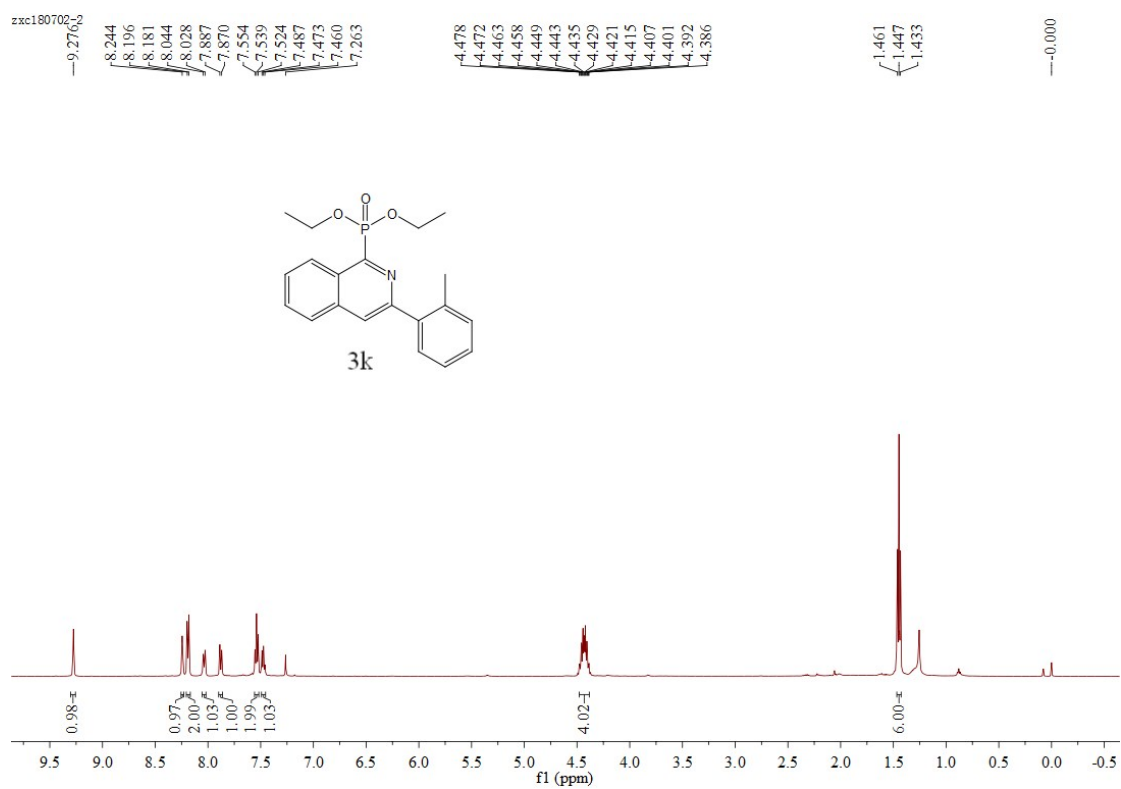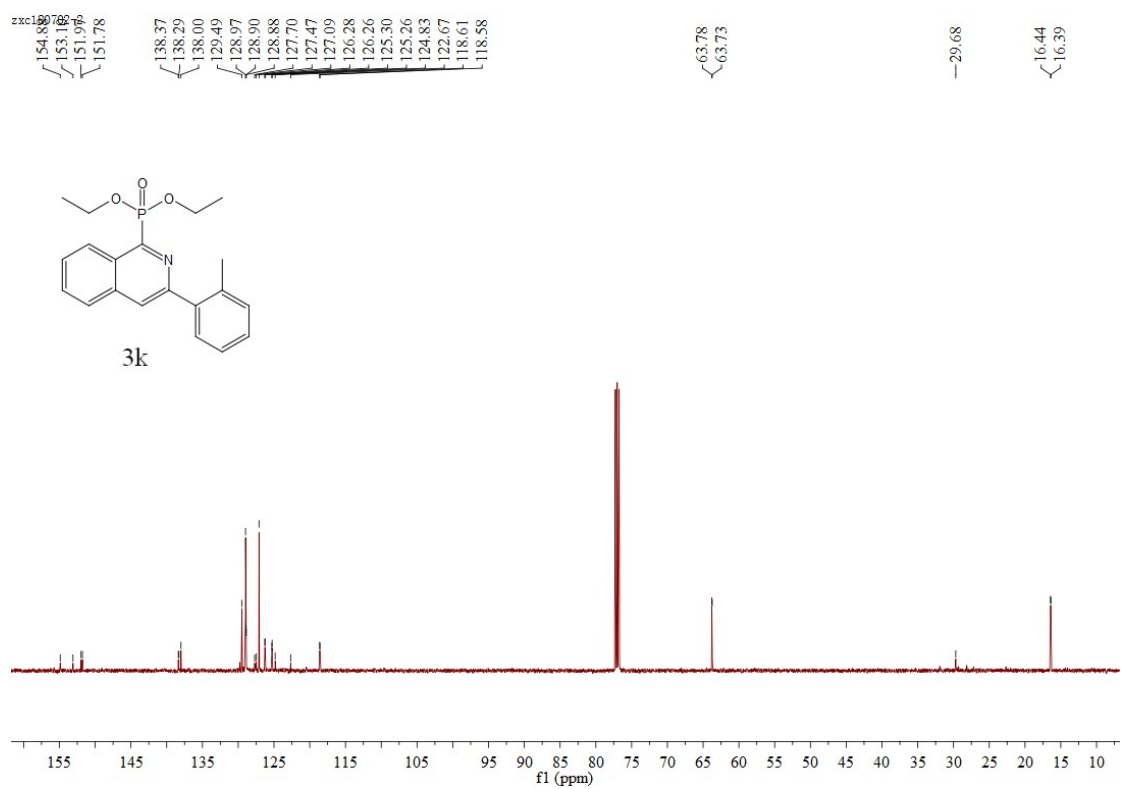



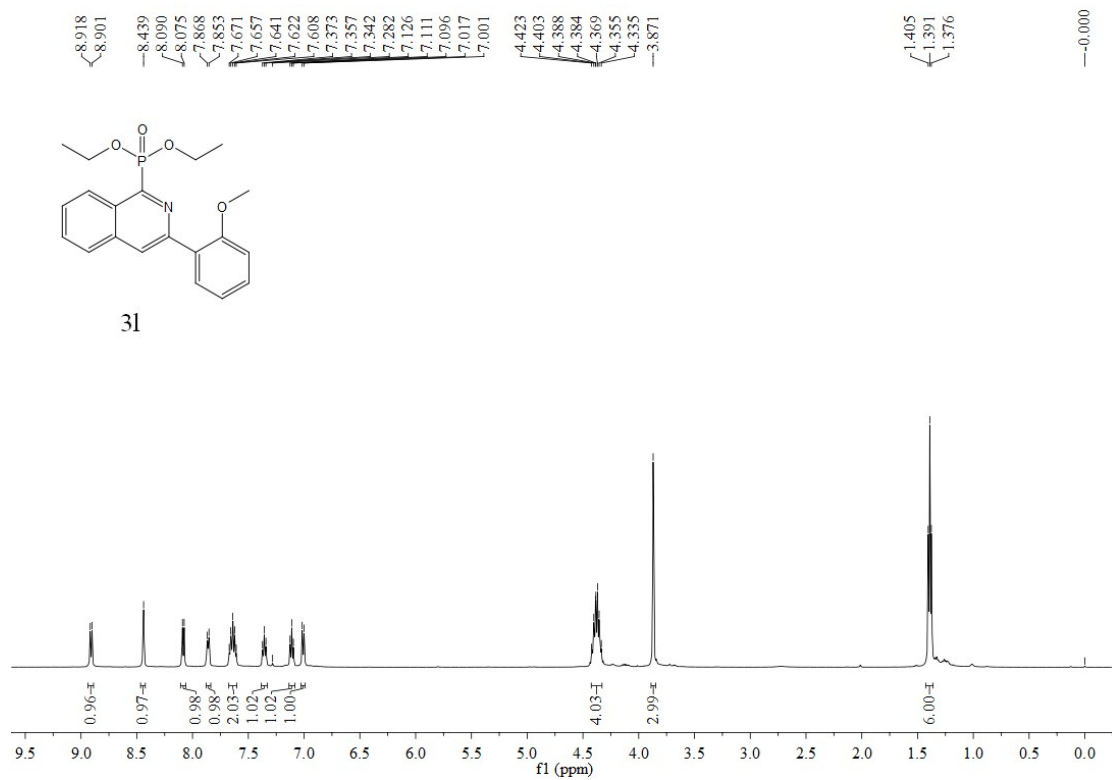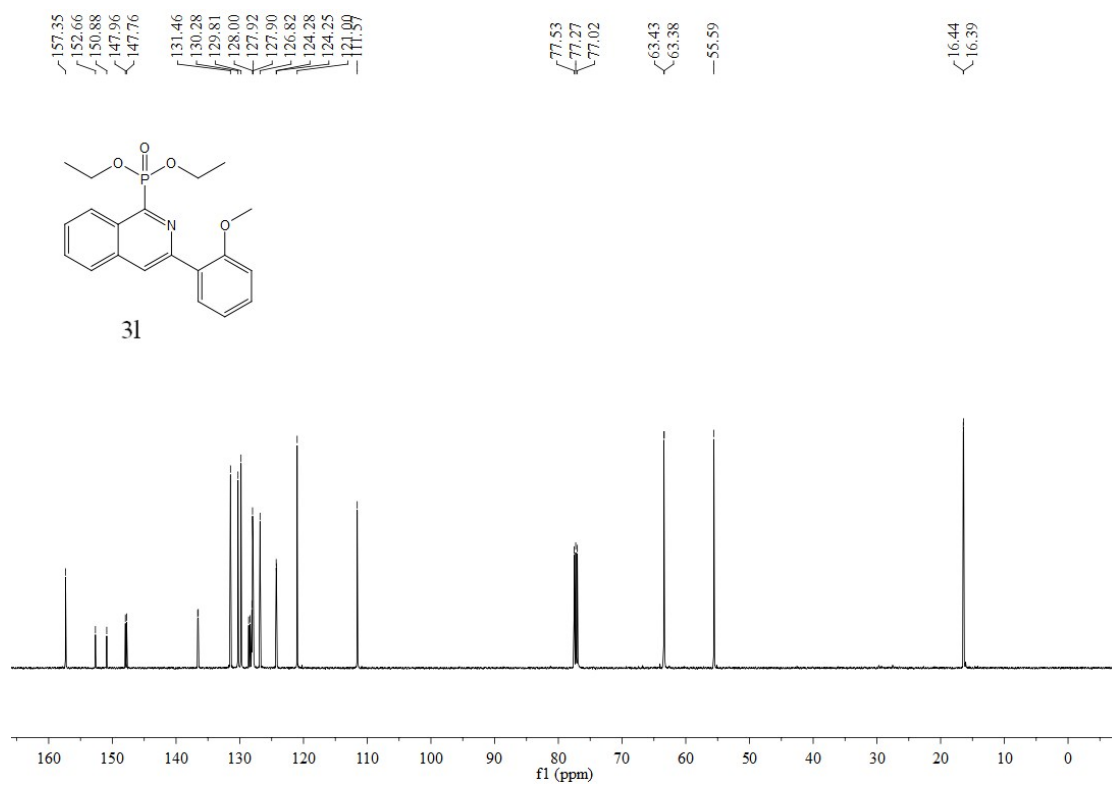

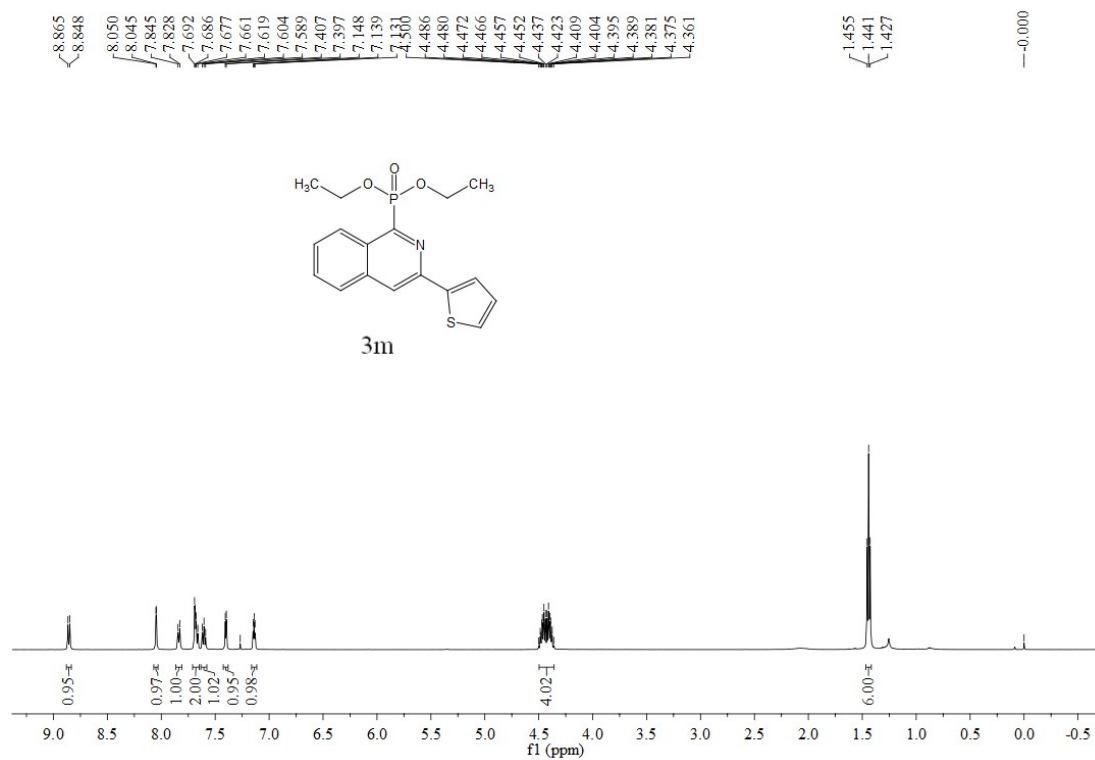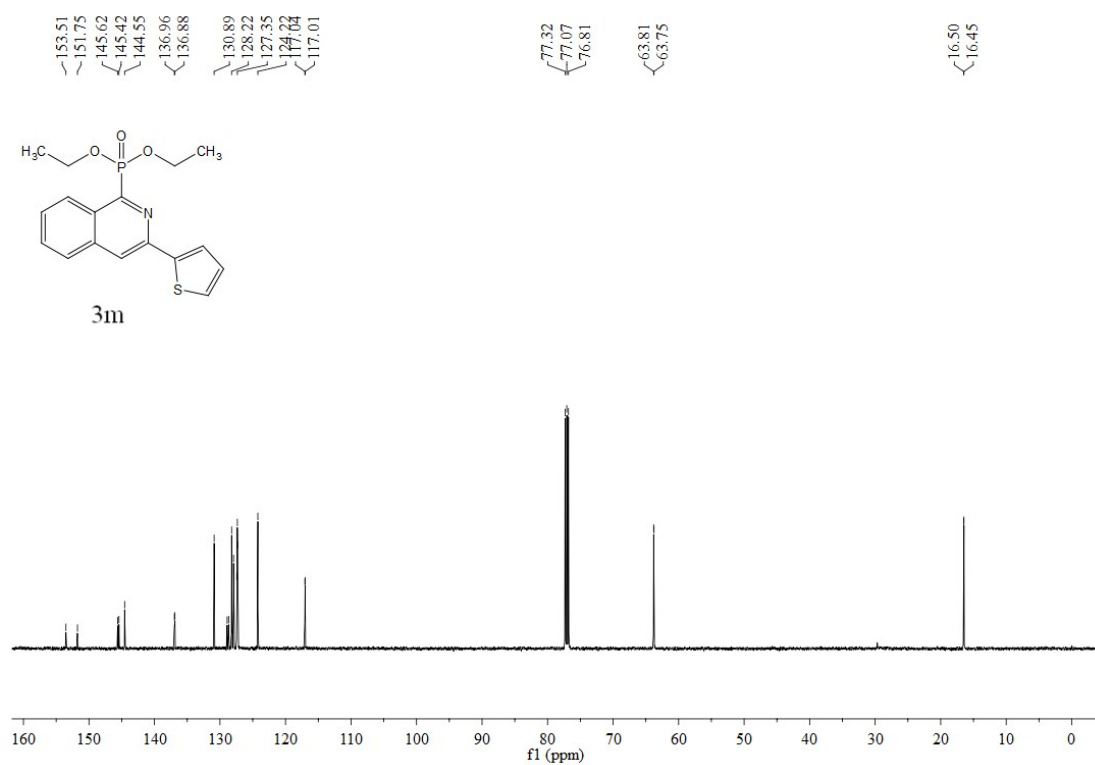

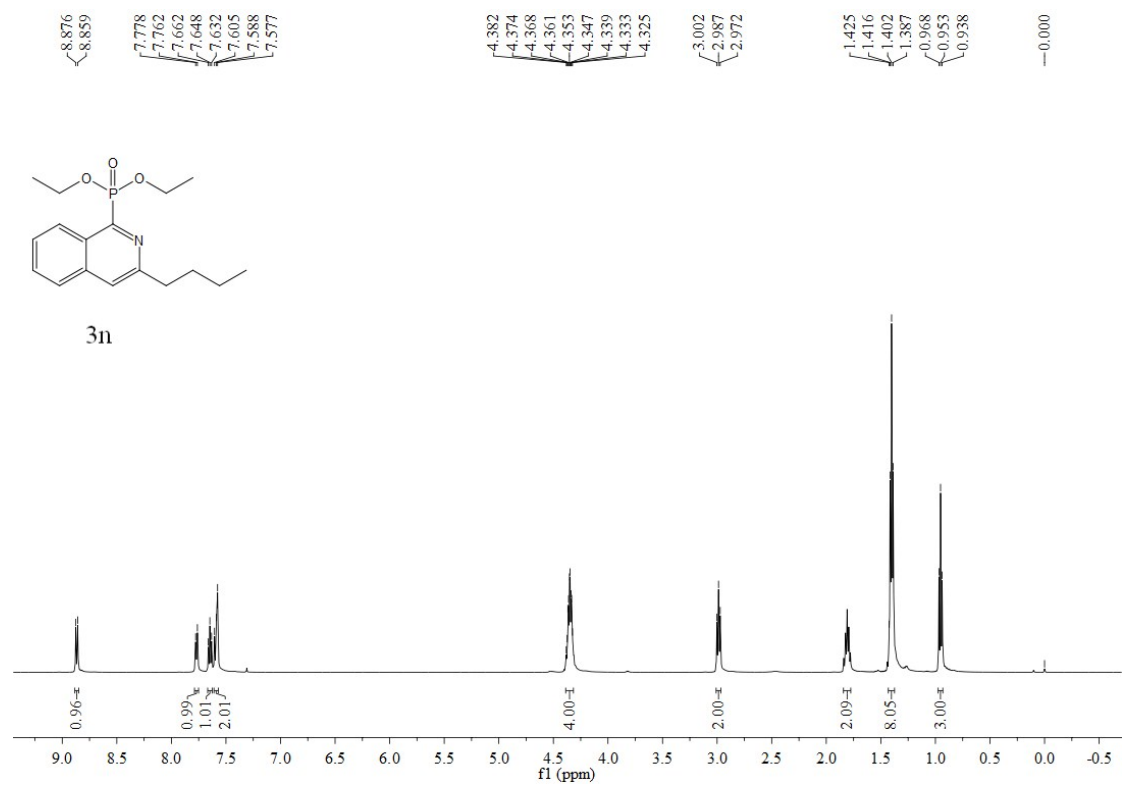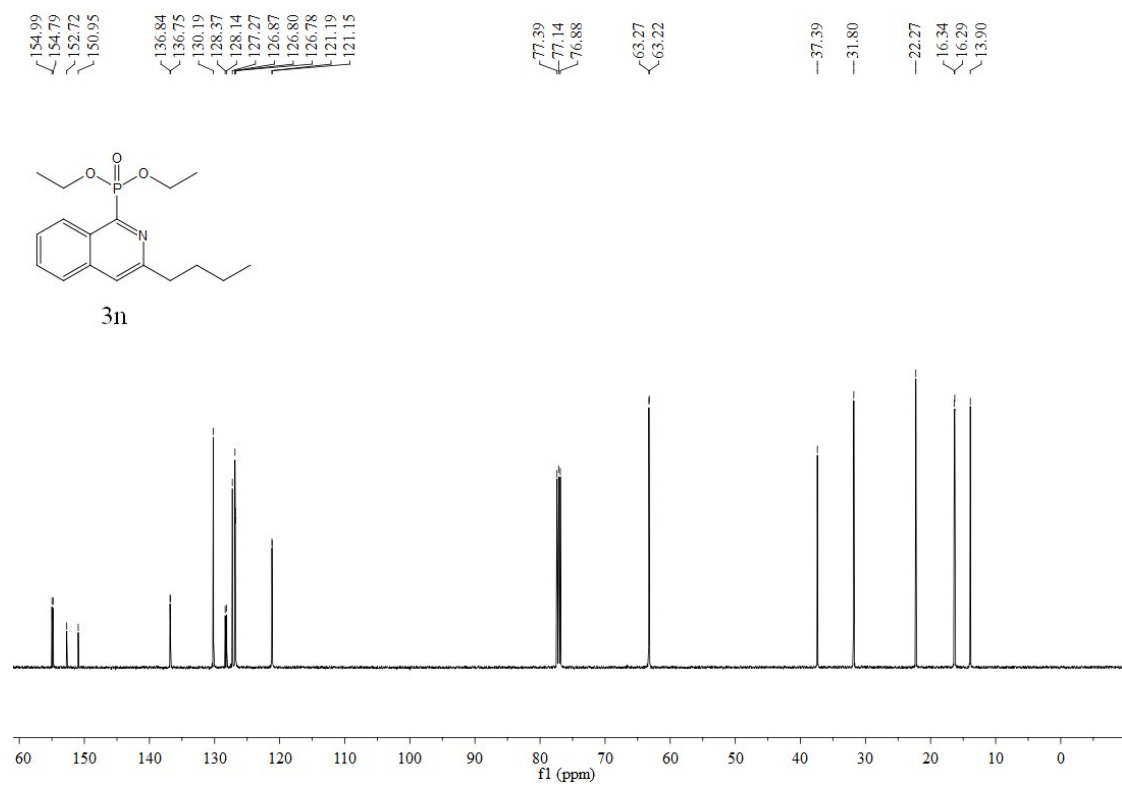

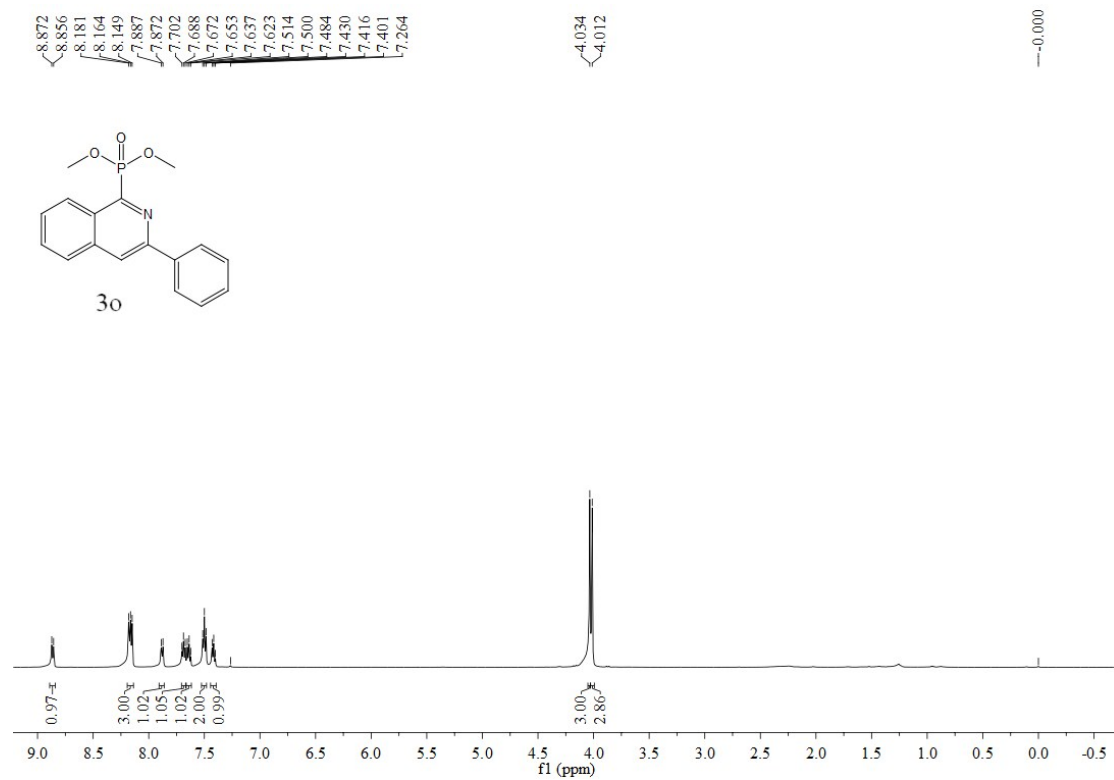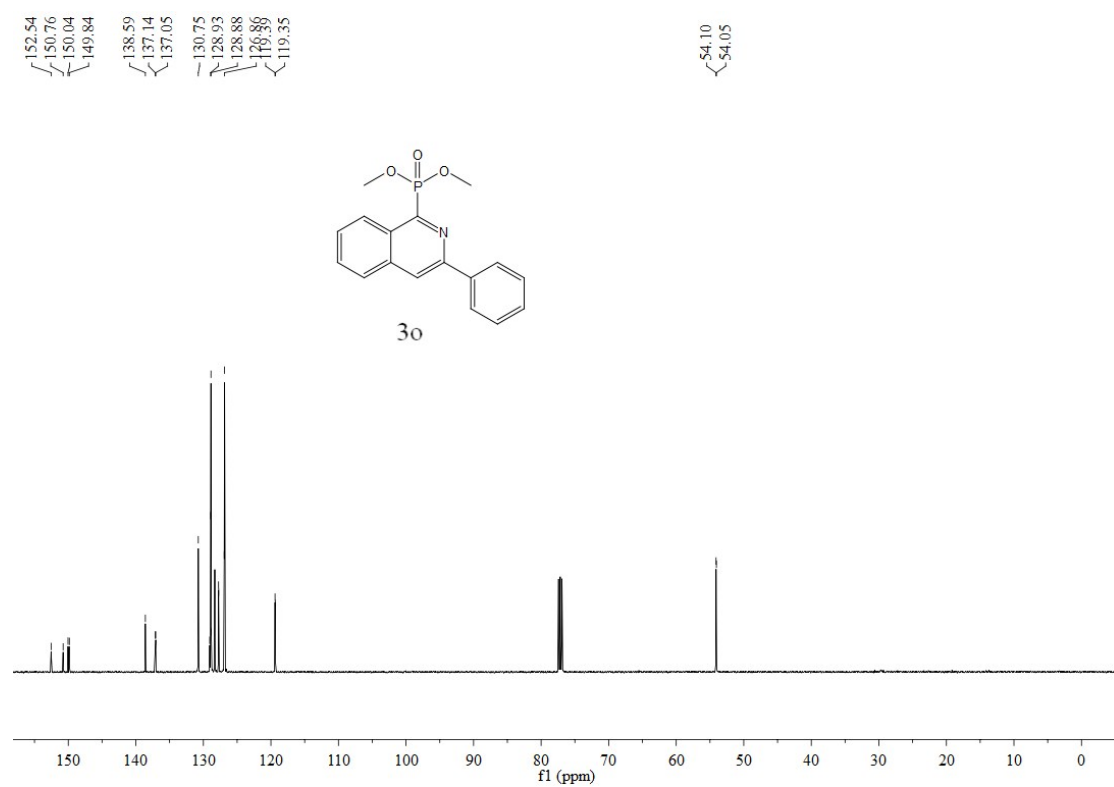

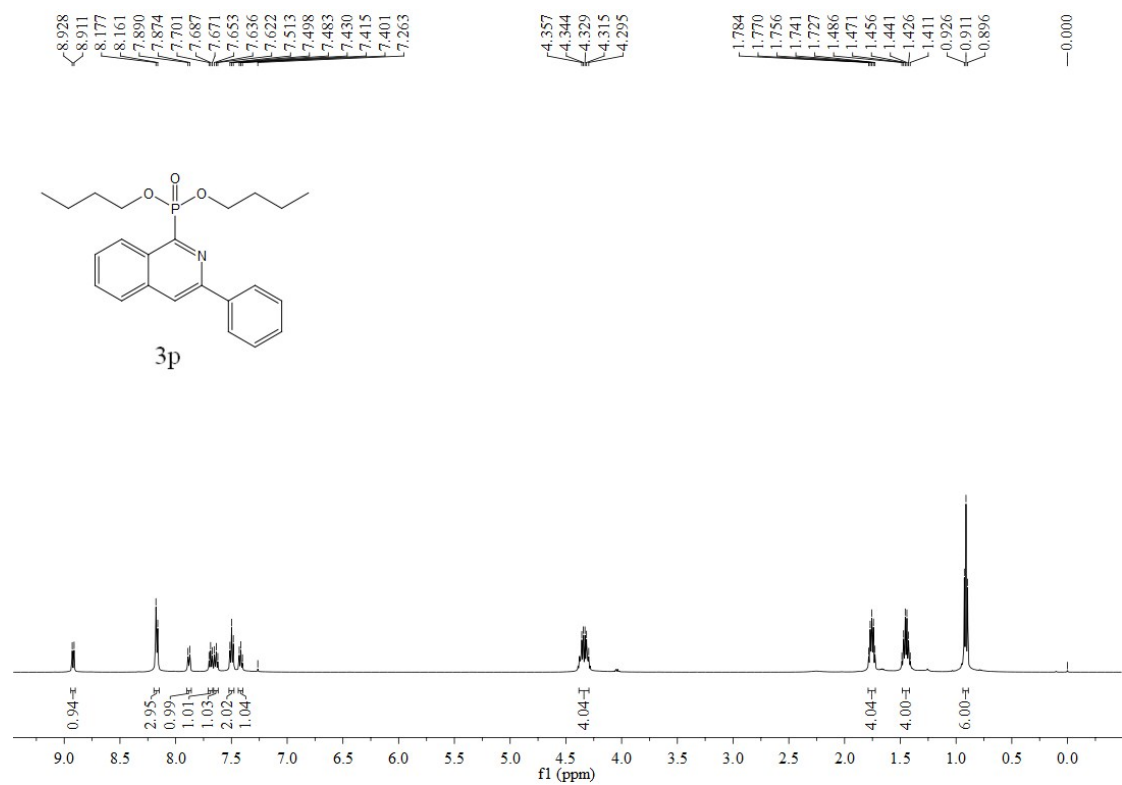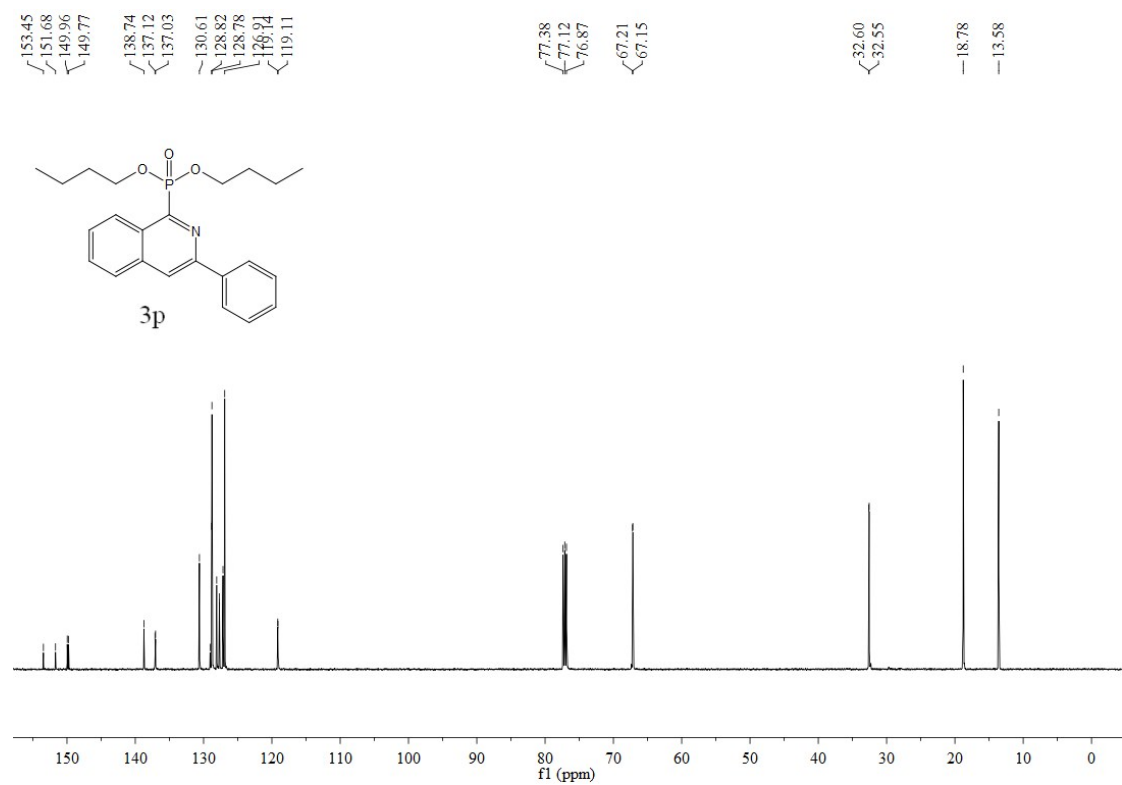

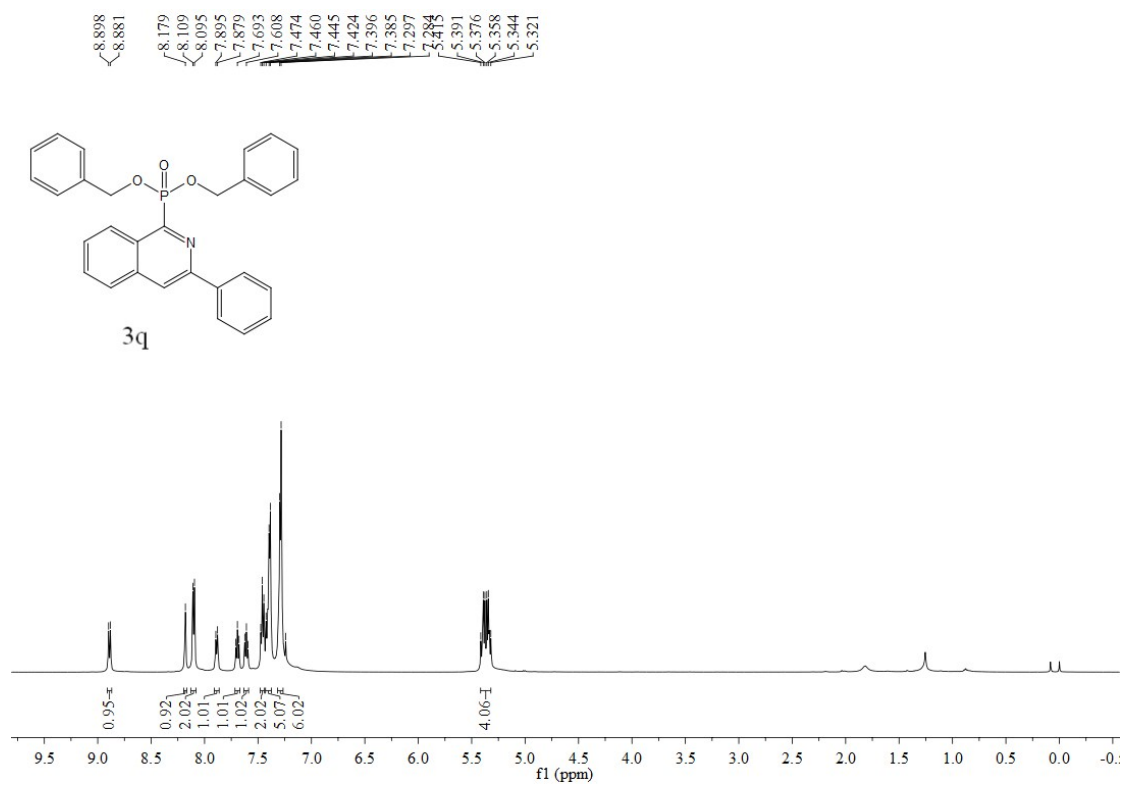

Supplement: c9qo00107g1.pdf [file c9qo00107g1.pdf]
